# Supplementary material for: Comprehensive multi-omics and single-cell analysis reveals TM9SF1 as a biomarker in pan-cancer diagnosis and prognosis, with a special focus on hepatocellular carcinoma
Source: Research Square preprint supplement (doi:10.21203/rs.3.rs-6181906/v1), 2025-03-13
Supplement: Supplementary file 1 [file 941974044aecafbf2fe73d9f.docx]

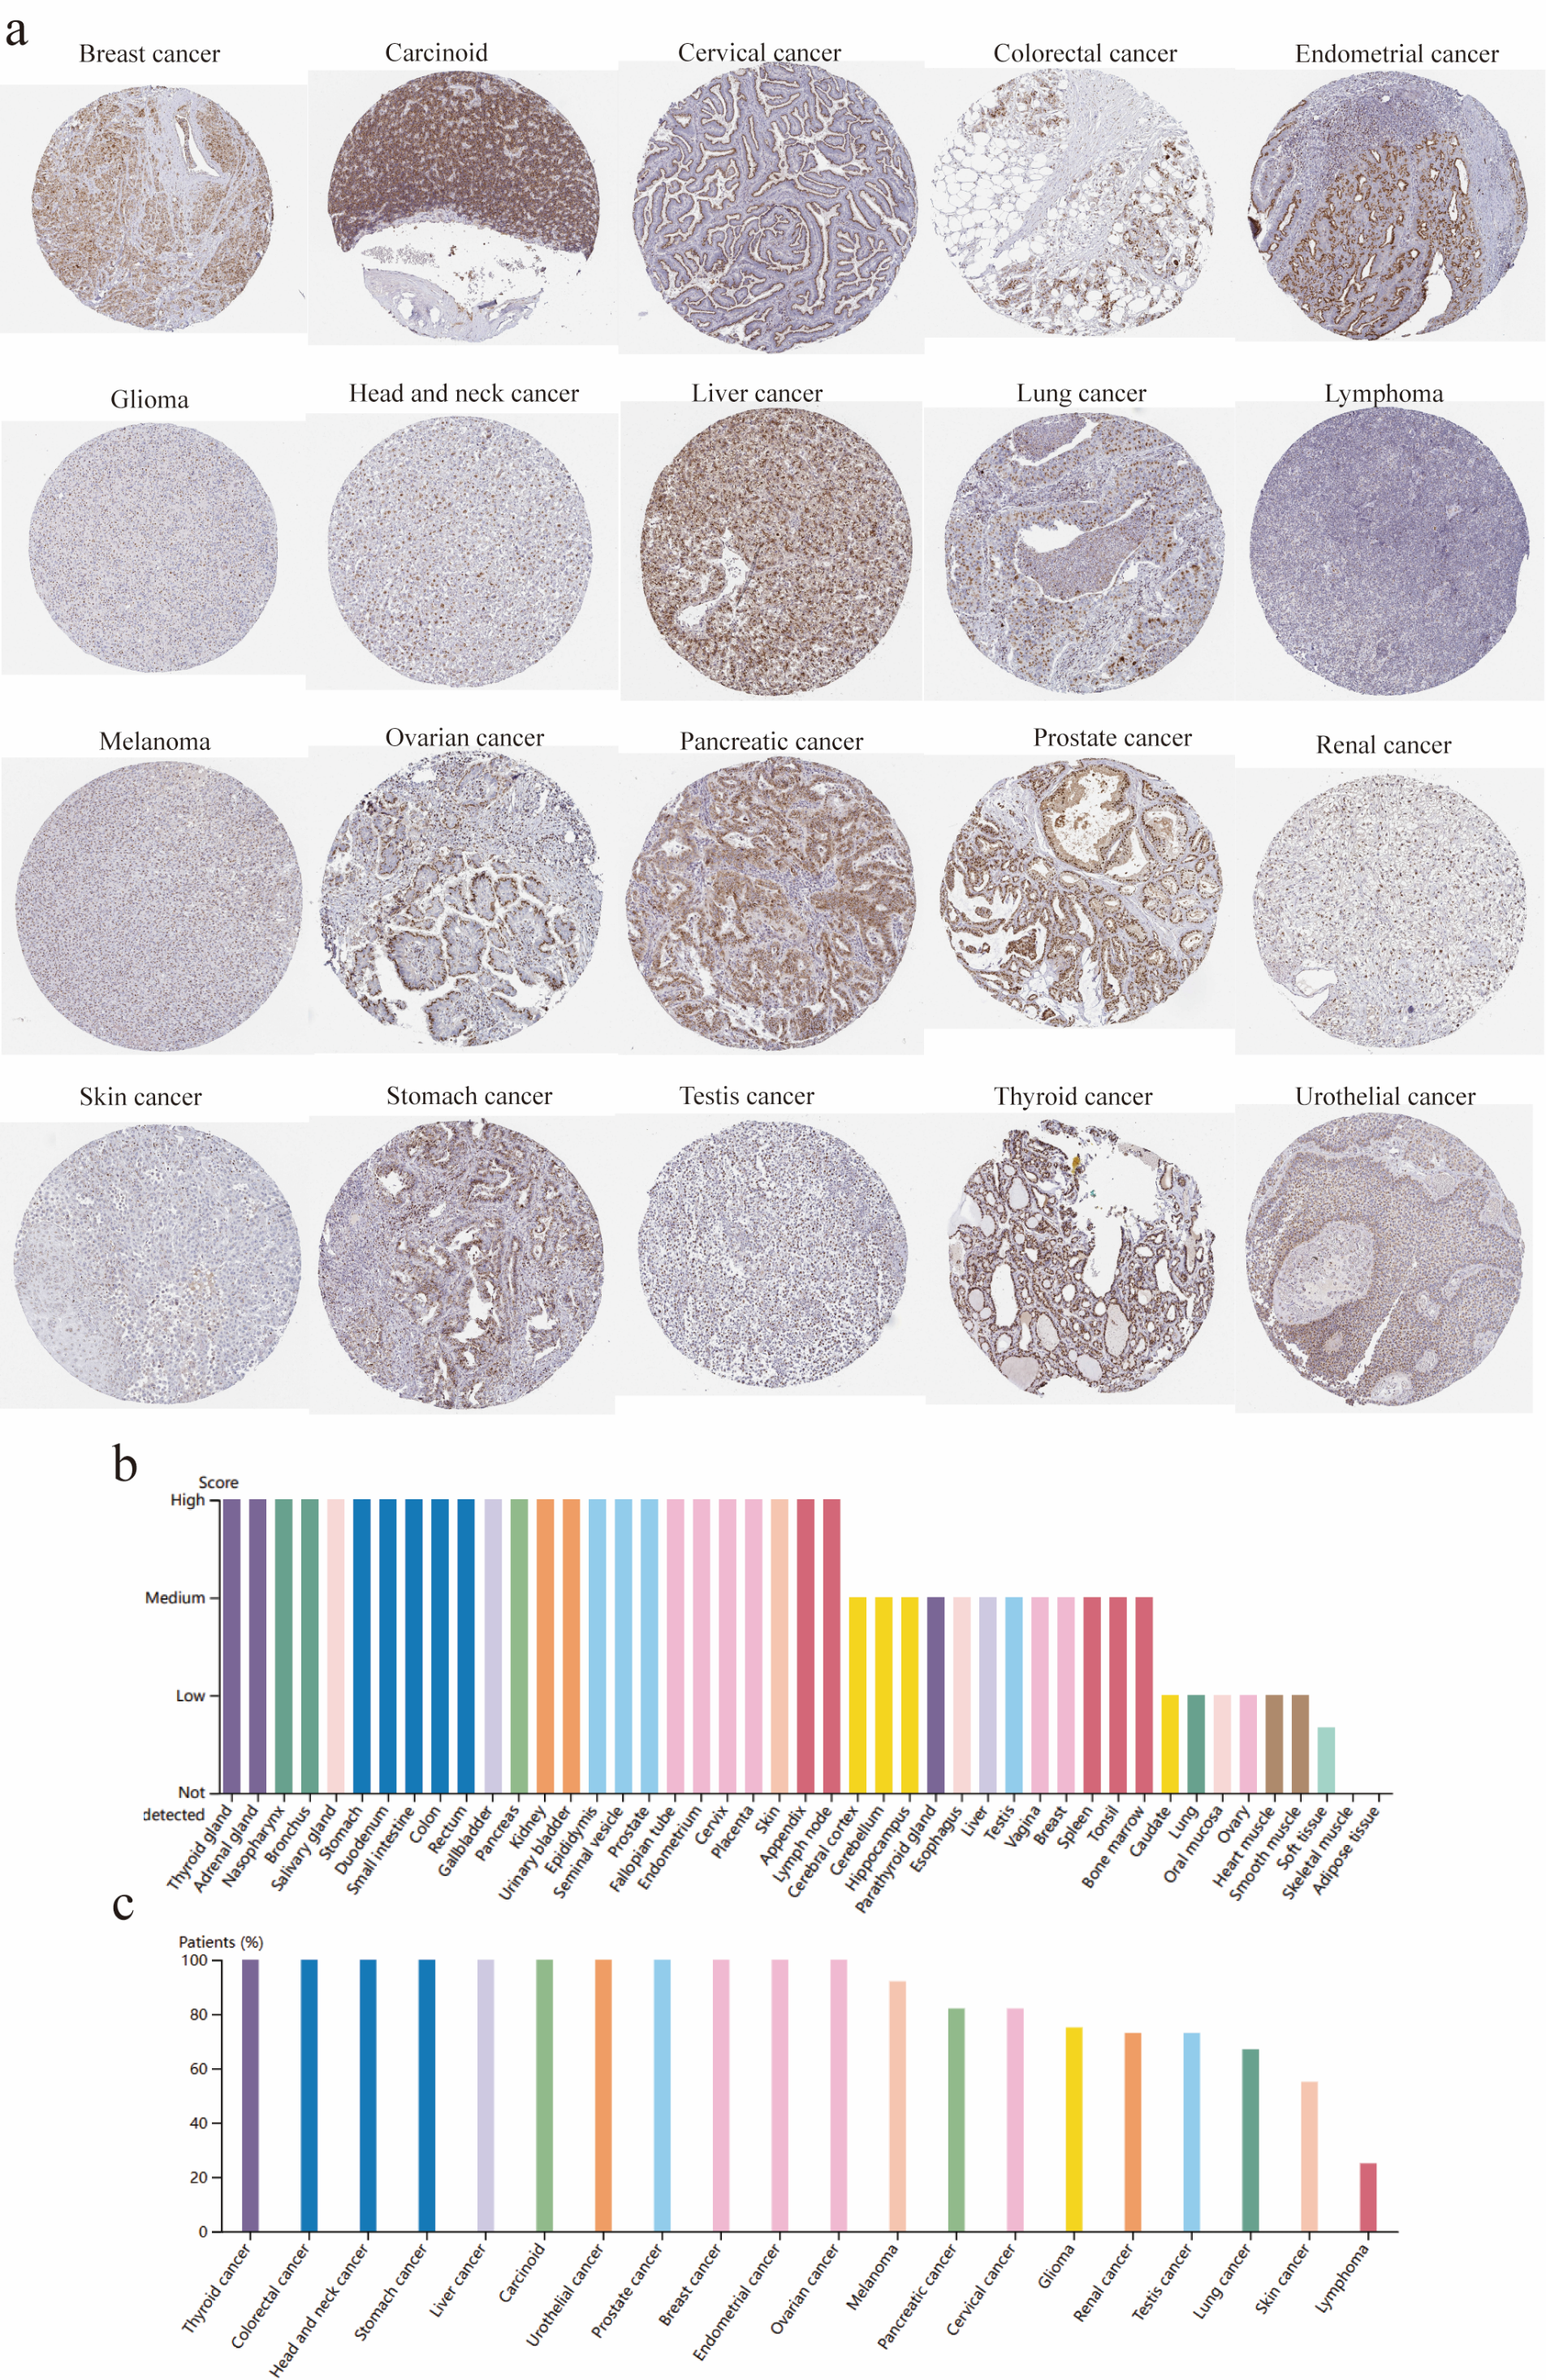


**Fig.s1.** TM9SF1 Protein levels in pan-cancer. **a**. Comparison of TM9SF1 protein expression between normal and tumor tissues through immunohistochemistry images. The protein level of TM9SF1 was analyzed in normal human tissues (**b**) and in different tumors (**c**).


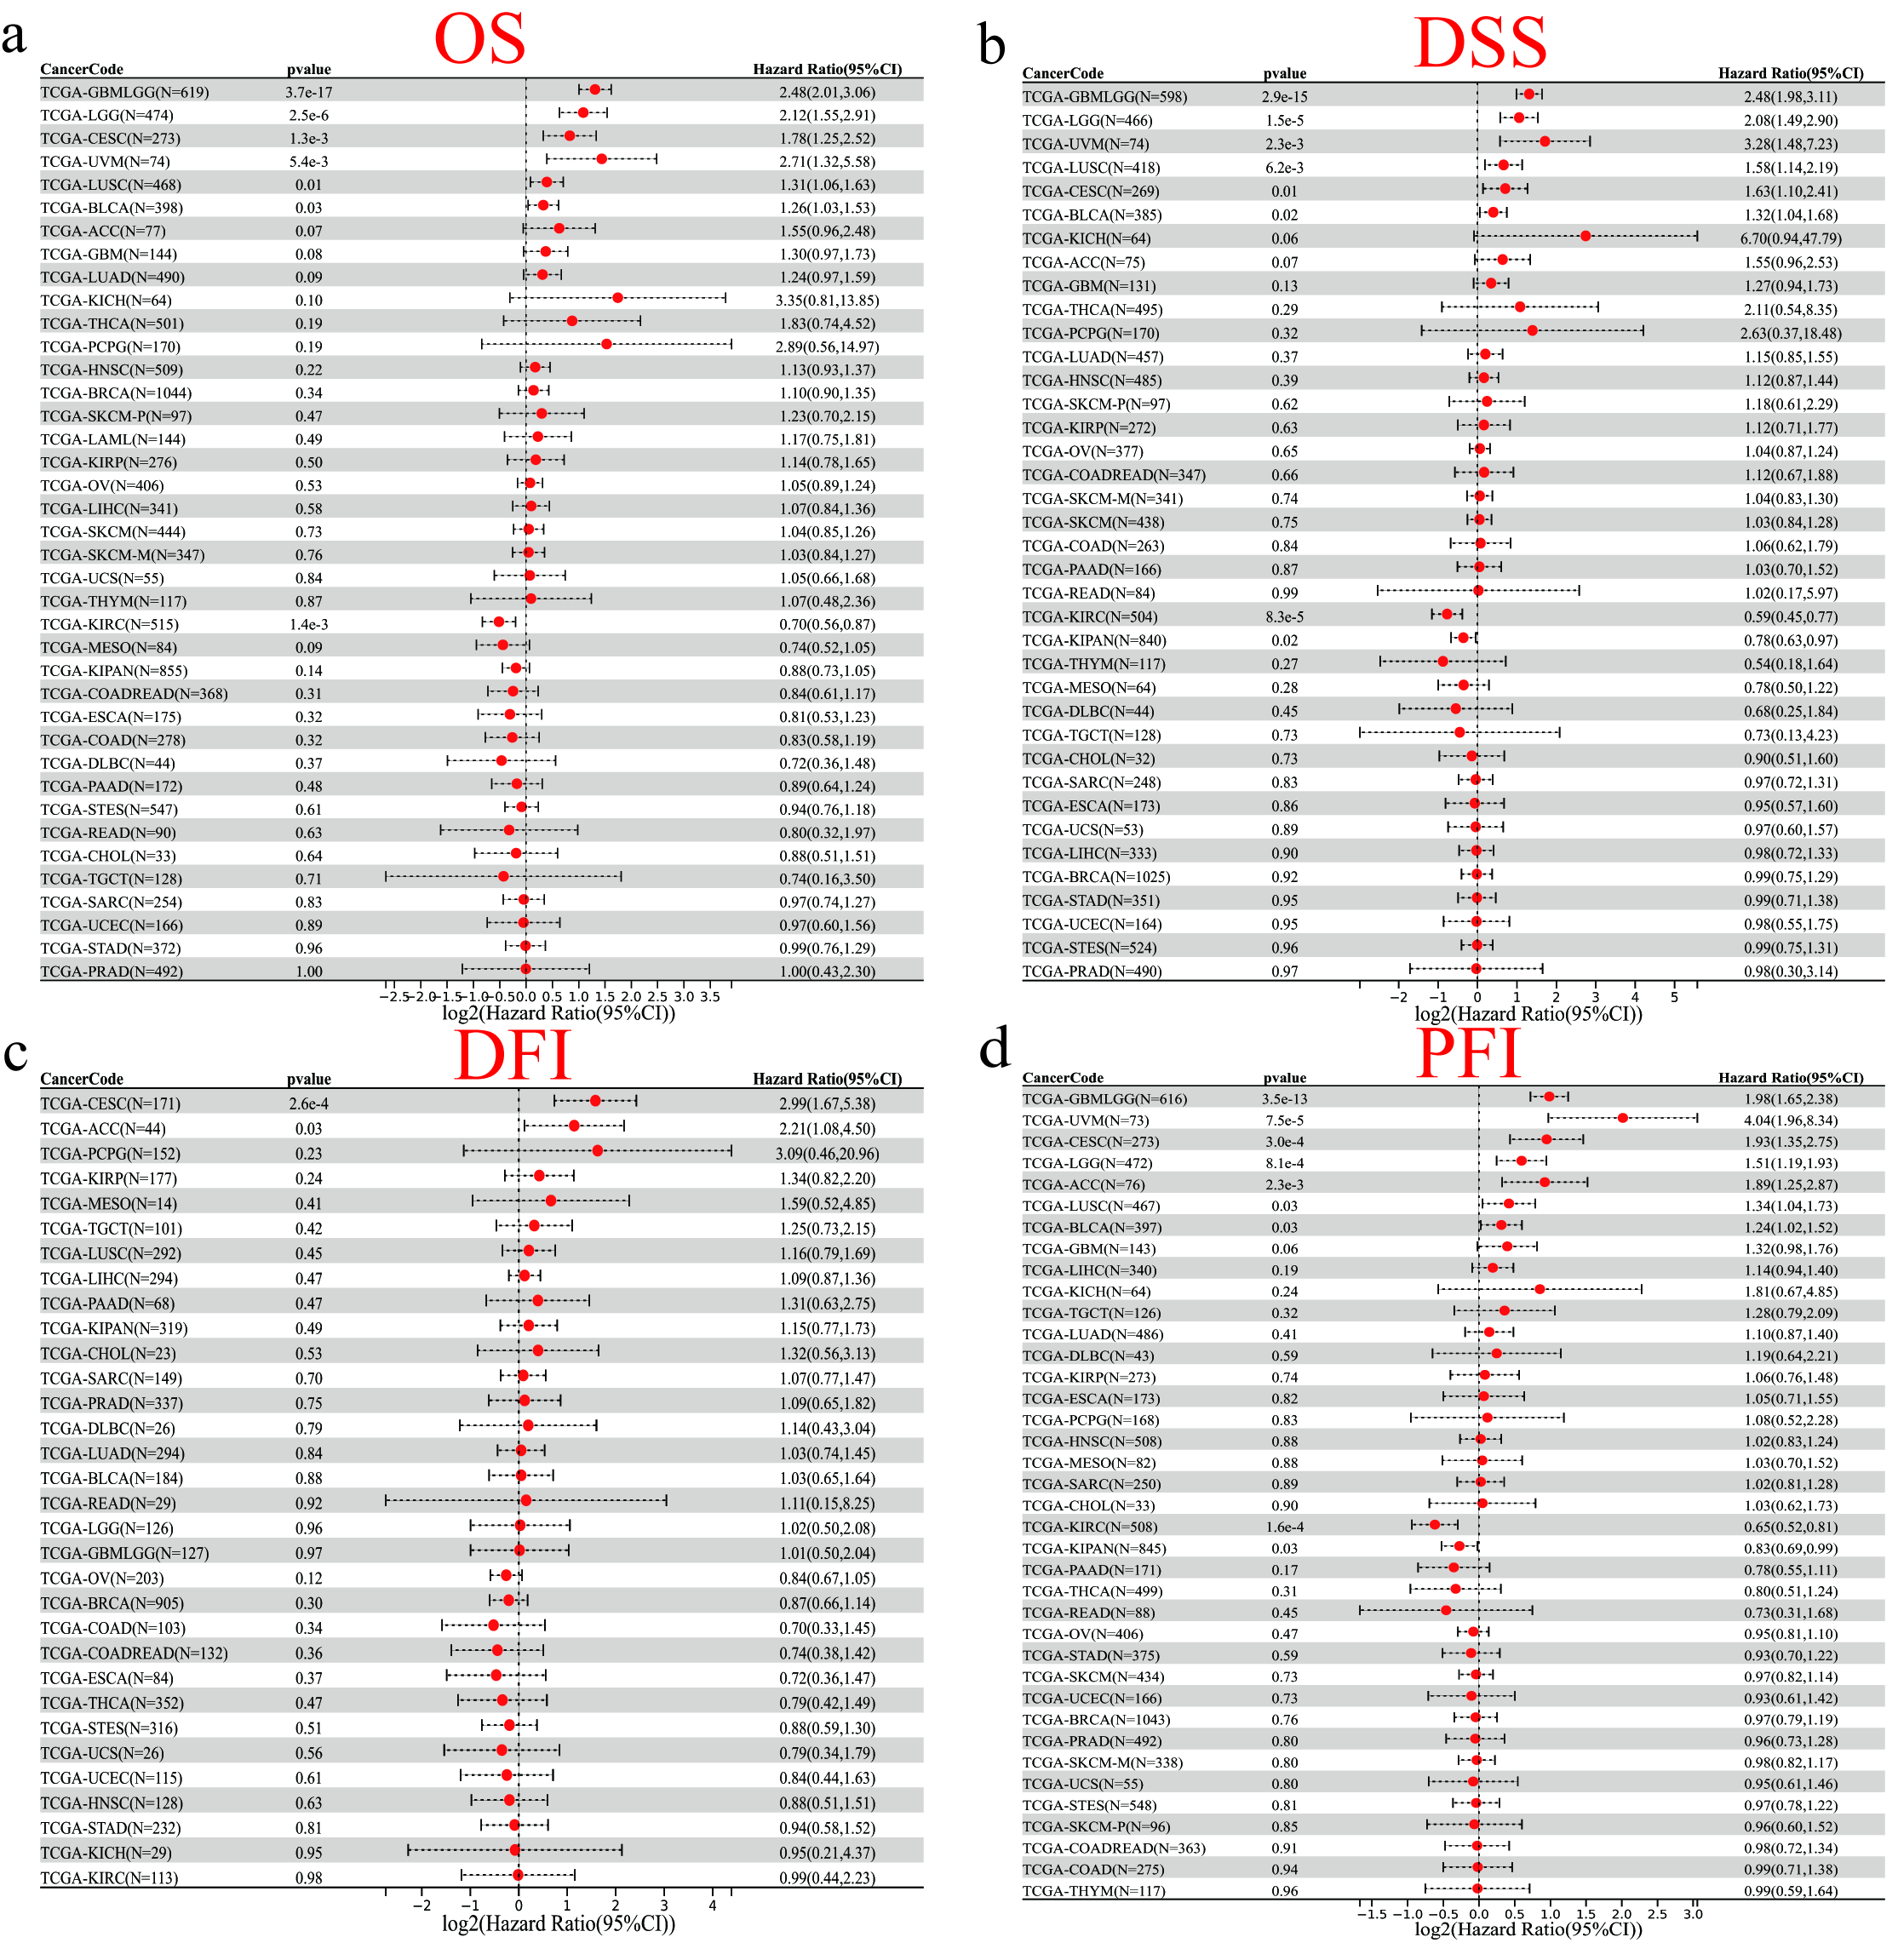


**Fig.s2.** Univariate Cox regression analysis of TM9SF1. Forest map showing the univariate Cox regression results of TM9SF1 for OS in the TCGA pan cancer cohort (**a**). Forest map showing the univariate Cox regression results of TM9SF1 for DSS in the TCGA pan-cancer cohort (**b**). The forest map shows the univariate Cox regression results of TM9SF1 for the DFI in the TCGA pan-cancer cohort (**c**). The forest map shows the univariate Cox regression results of TM9SF1 for PFI in the TCGA pan-cancer cohort (**d**). Red represents significant results.


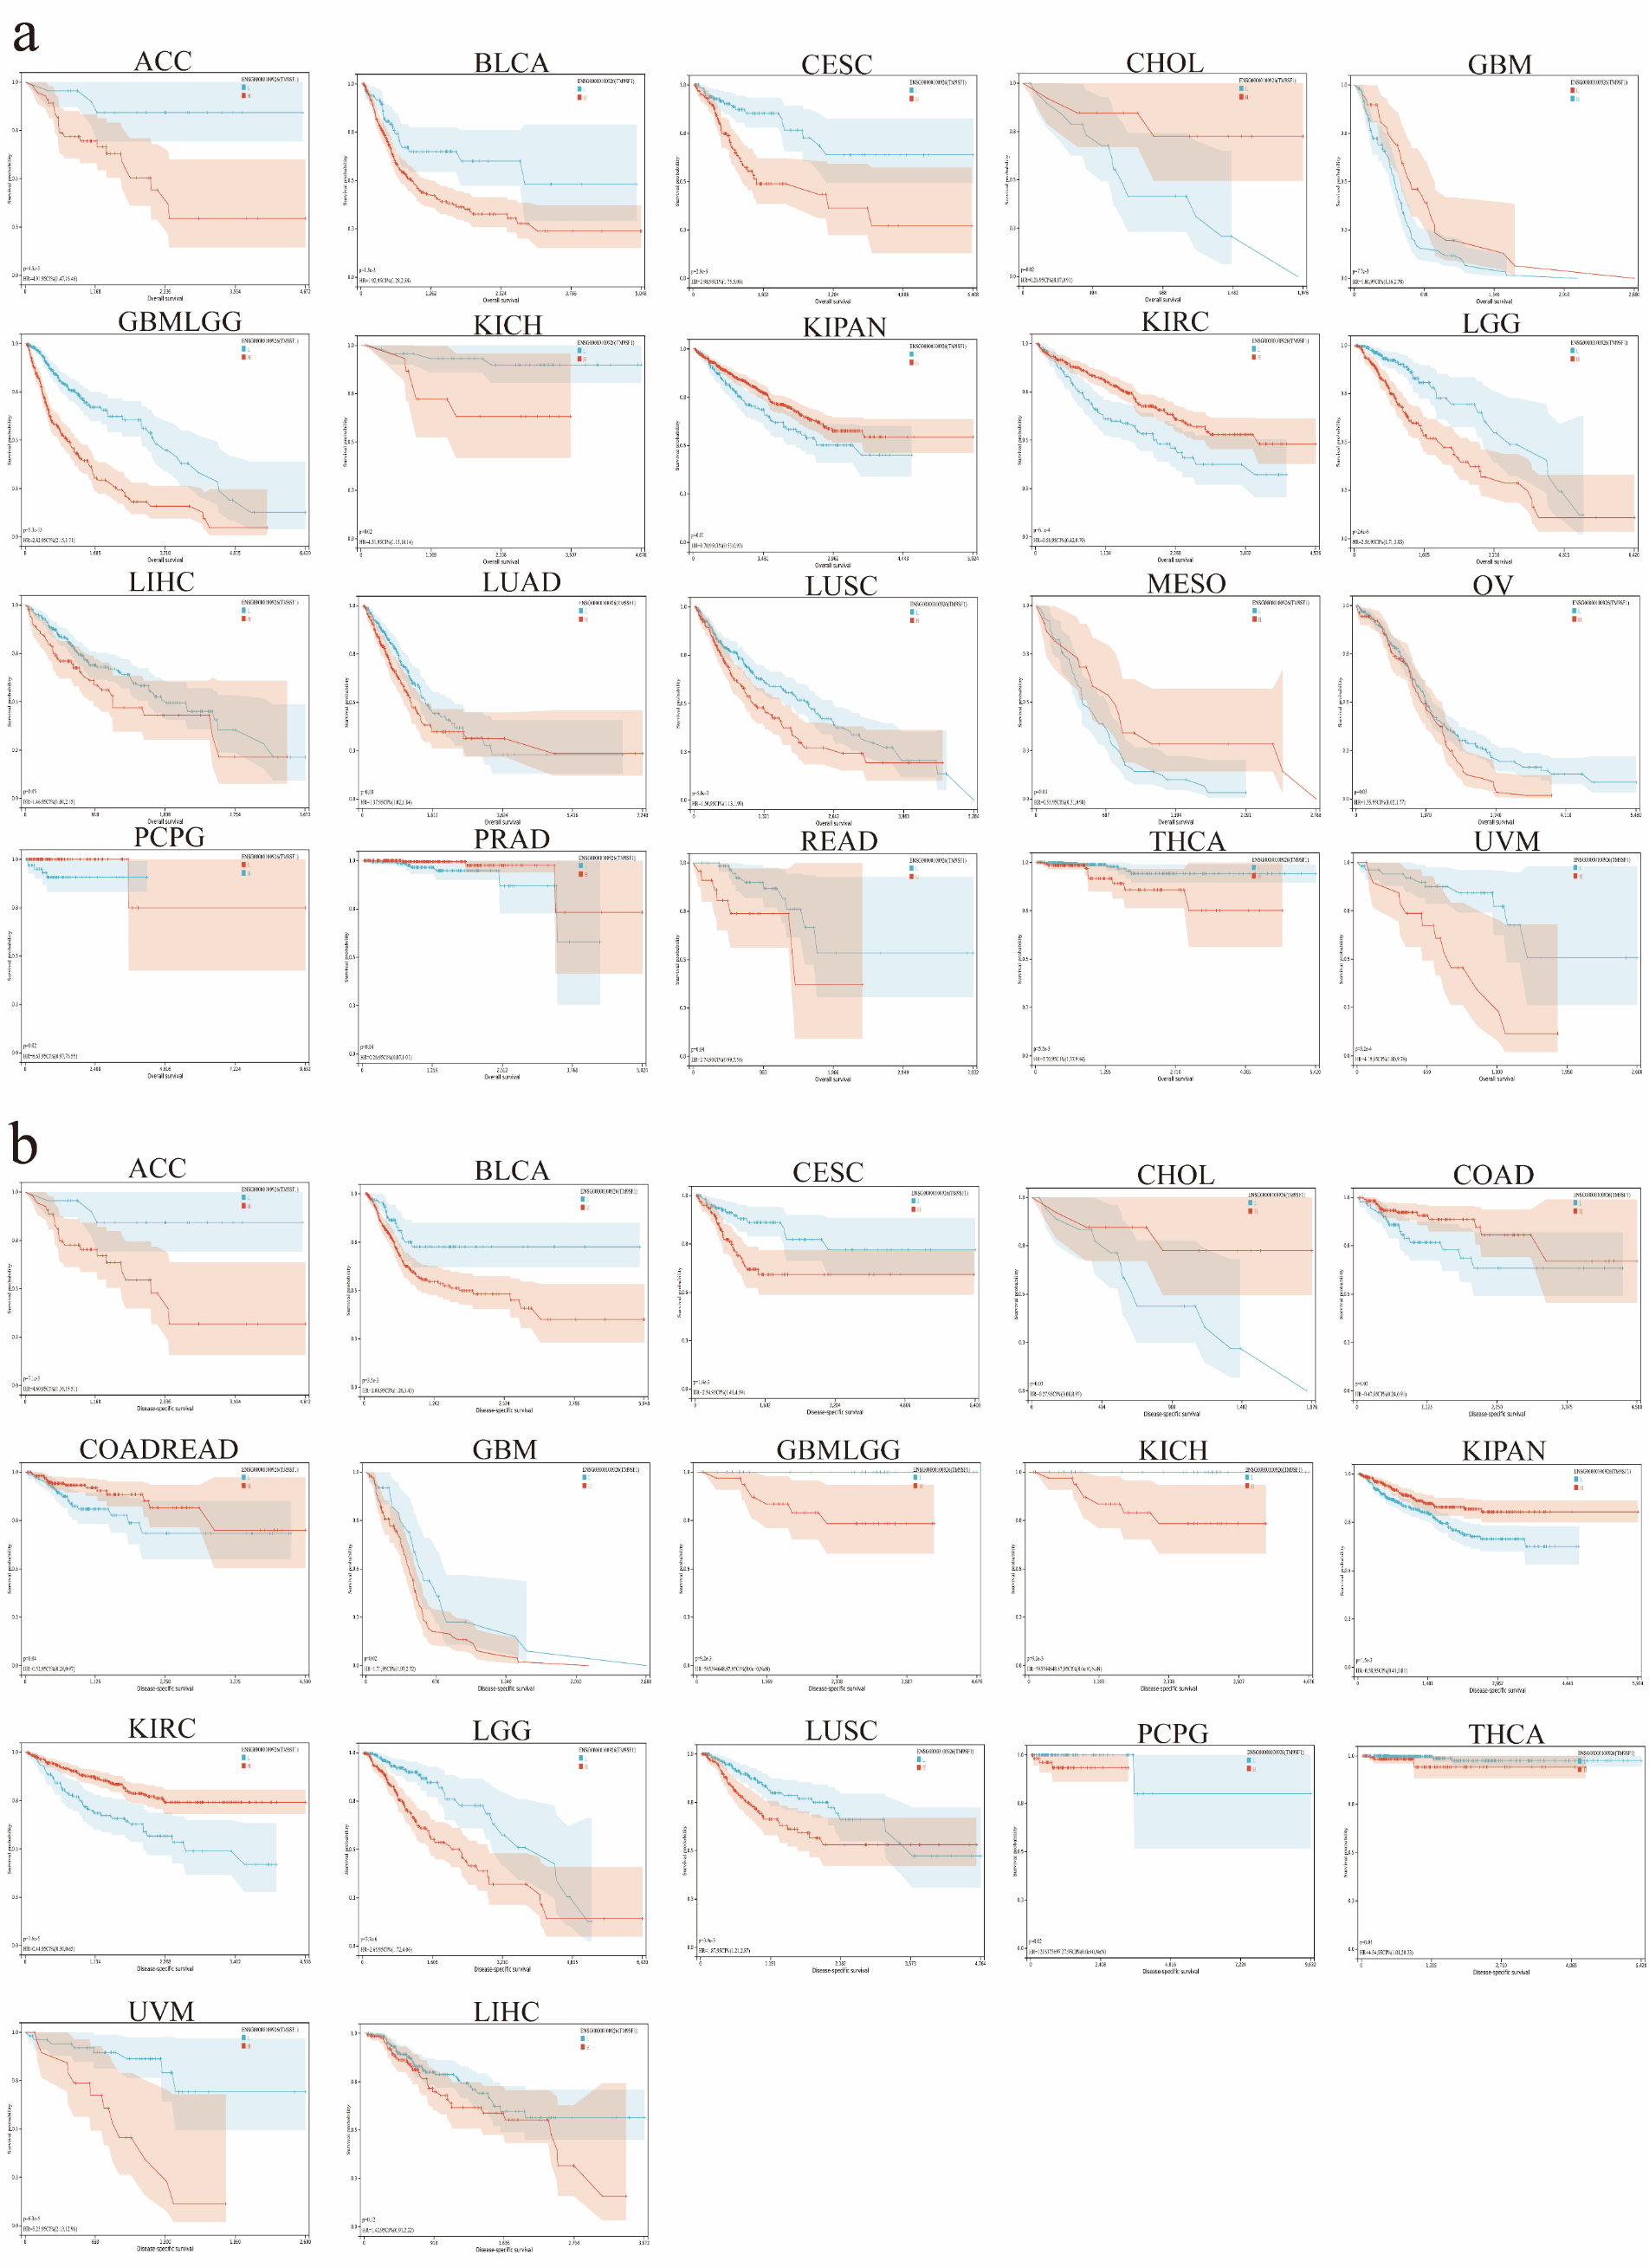


**Fig.s3.** Kaplan–Meier survival curves between low and high TM9SF1 expression using TCGA database (red line: low expression of TM9SF1, blue line: high expression of TM9SF1). **(a)** OS. **(b)** DSS. (For interpretation of the references to color in this figure legend, the reader is referred to the web version of this article).


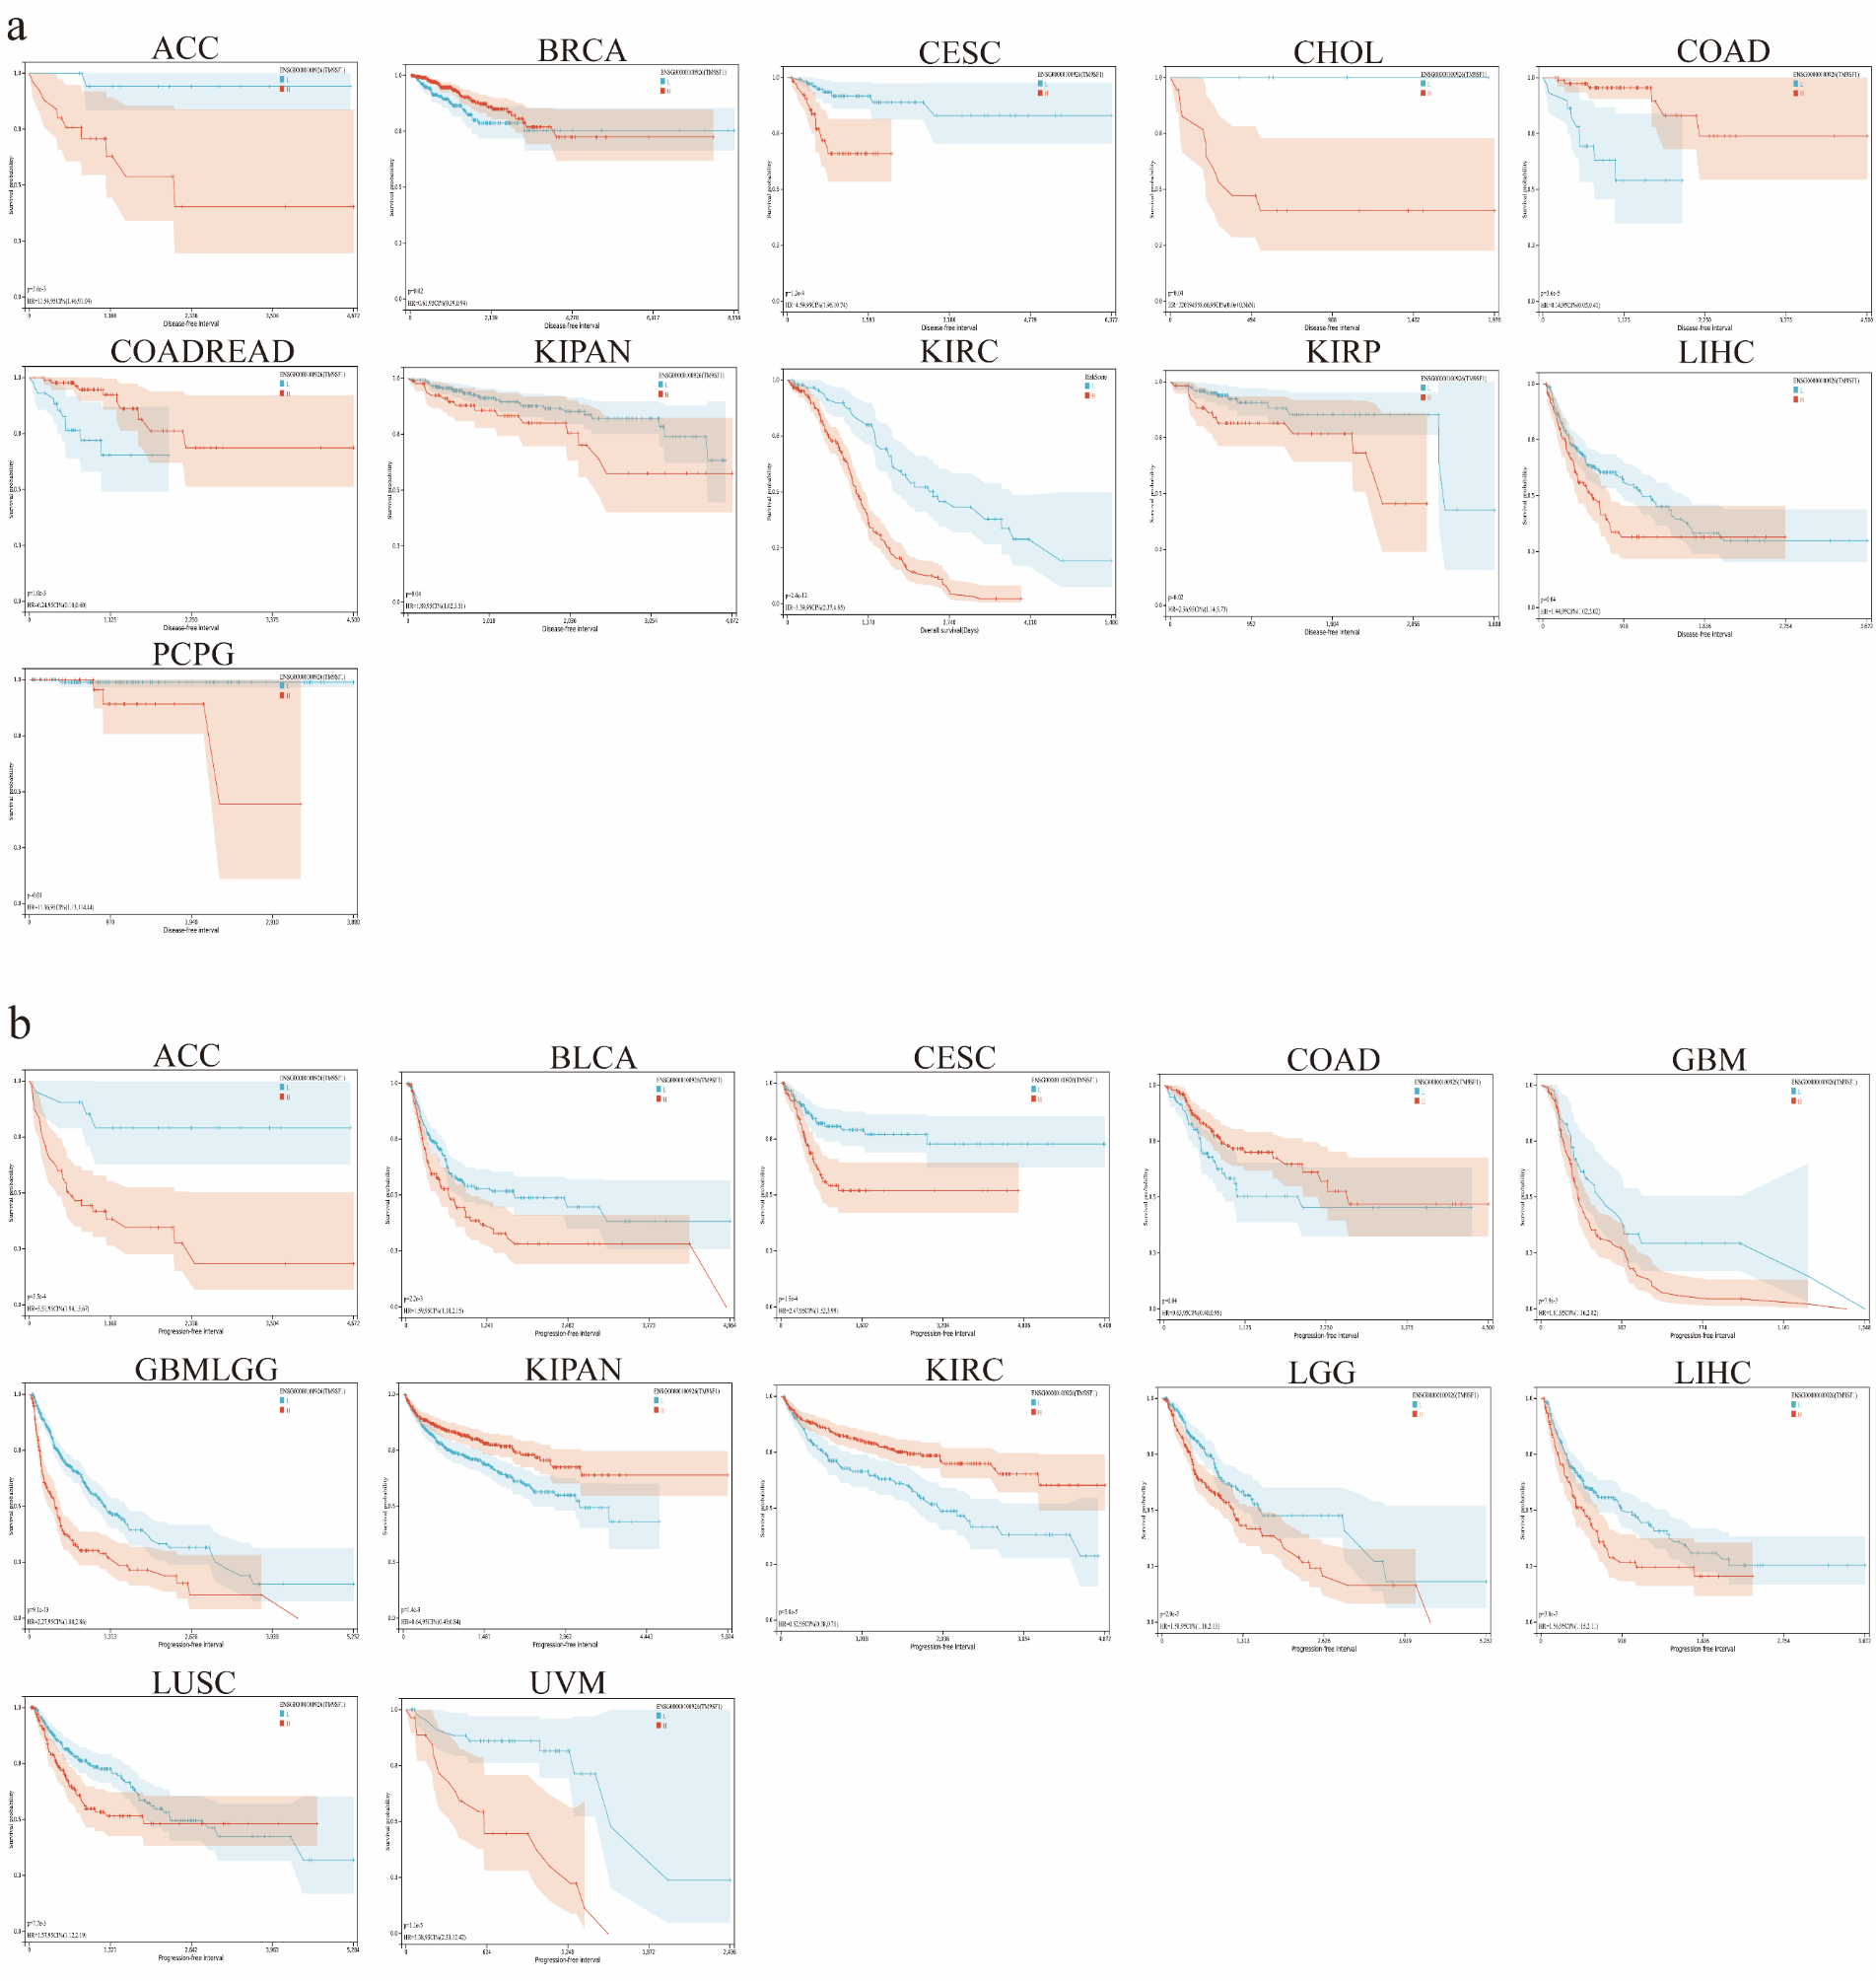


**Fig.s4.** Kaplan–Meier survival curves between low and high TM9SF1 expression using TCGA database (red line: low expression of TM9SF1, blue line: high expression of TM9SF1). **(a)** DFI. **(b)**PFI. (For interpretation of the references to color in this figure legend, the reader is referred to the web version of this article).


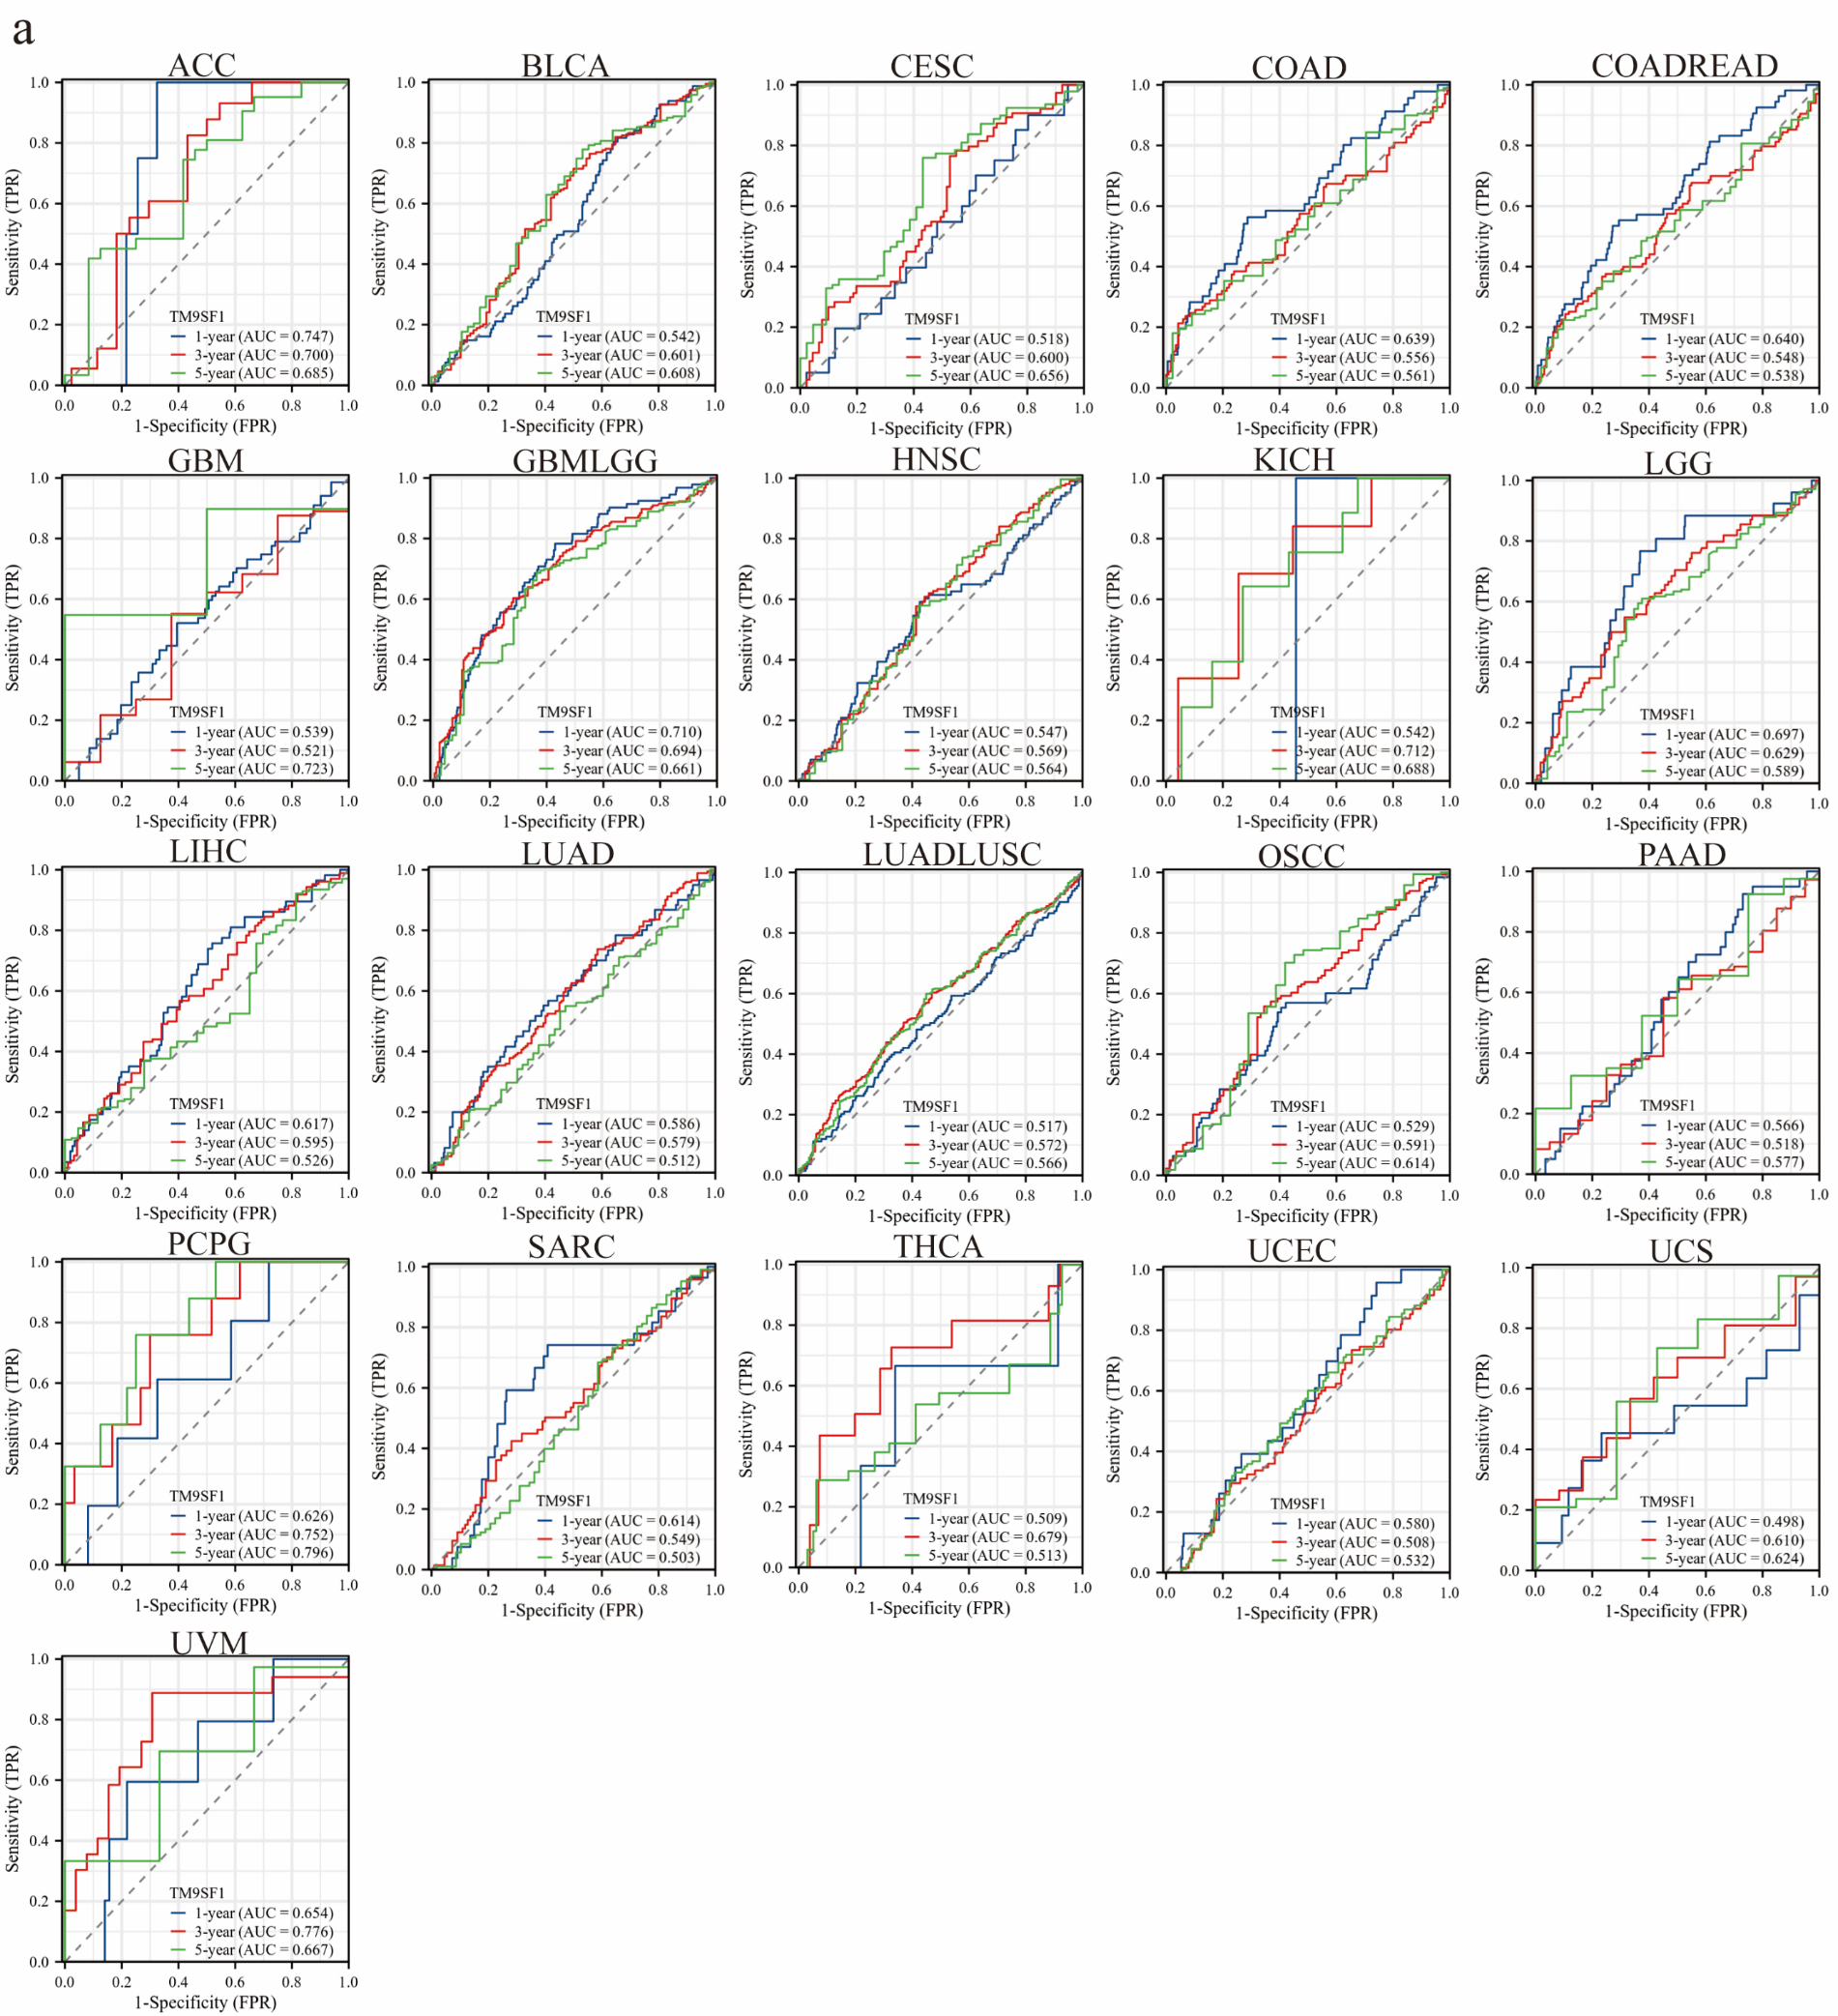


**Fig.s5.** **a**. ROC analysis showed the value of TM9SF1 in predicting 1-, 3-, and 5-year survival status in 21 tumor types (blue line: 1-year survival status, red line: 3-year survival status, green line: 5-year survival status). (For interpretation of the references to color in this figure legend, the reader is referred to the web version of this article).


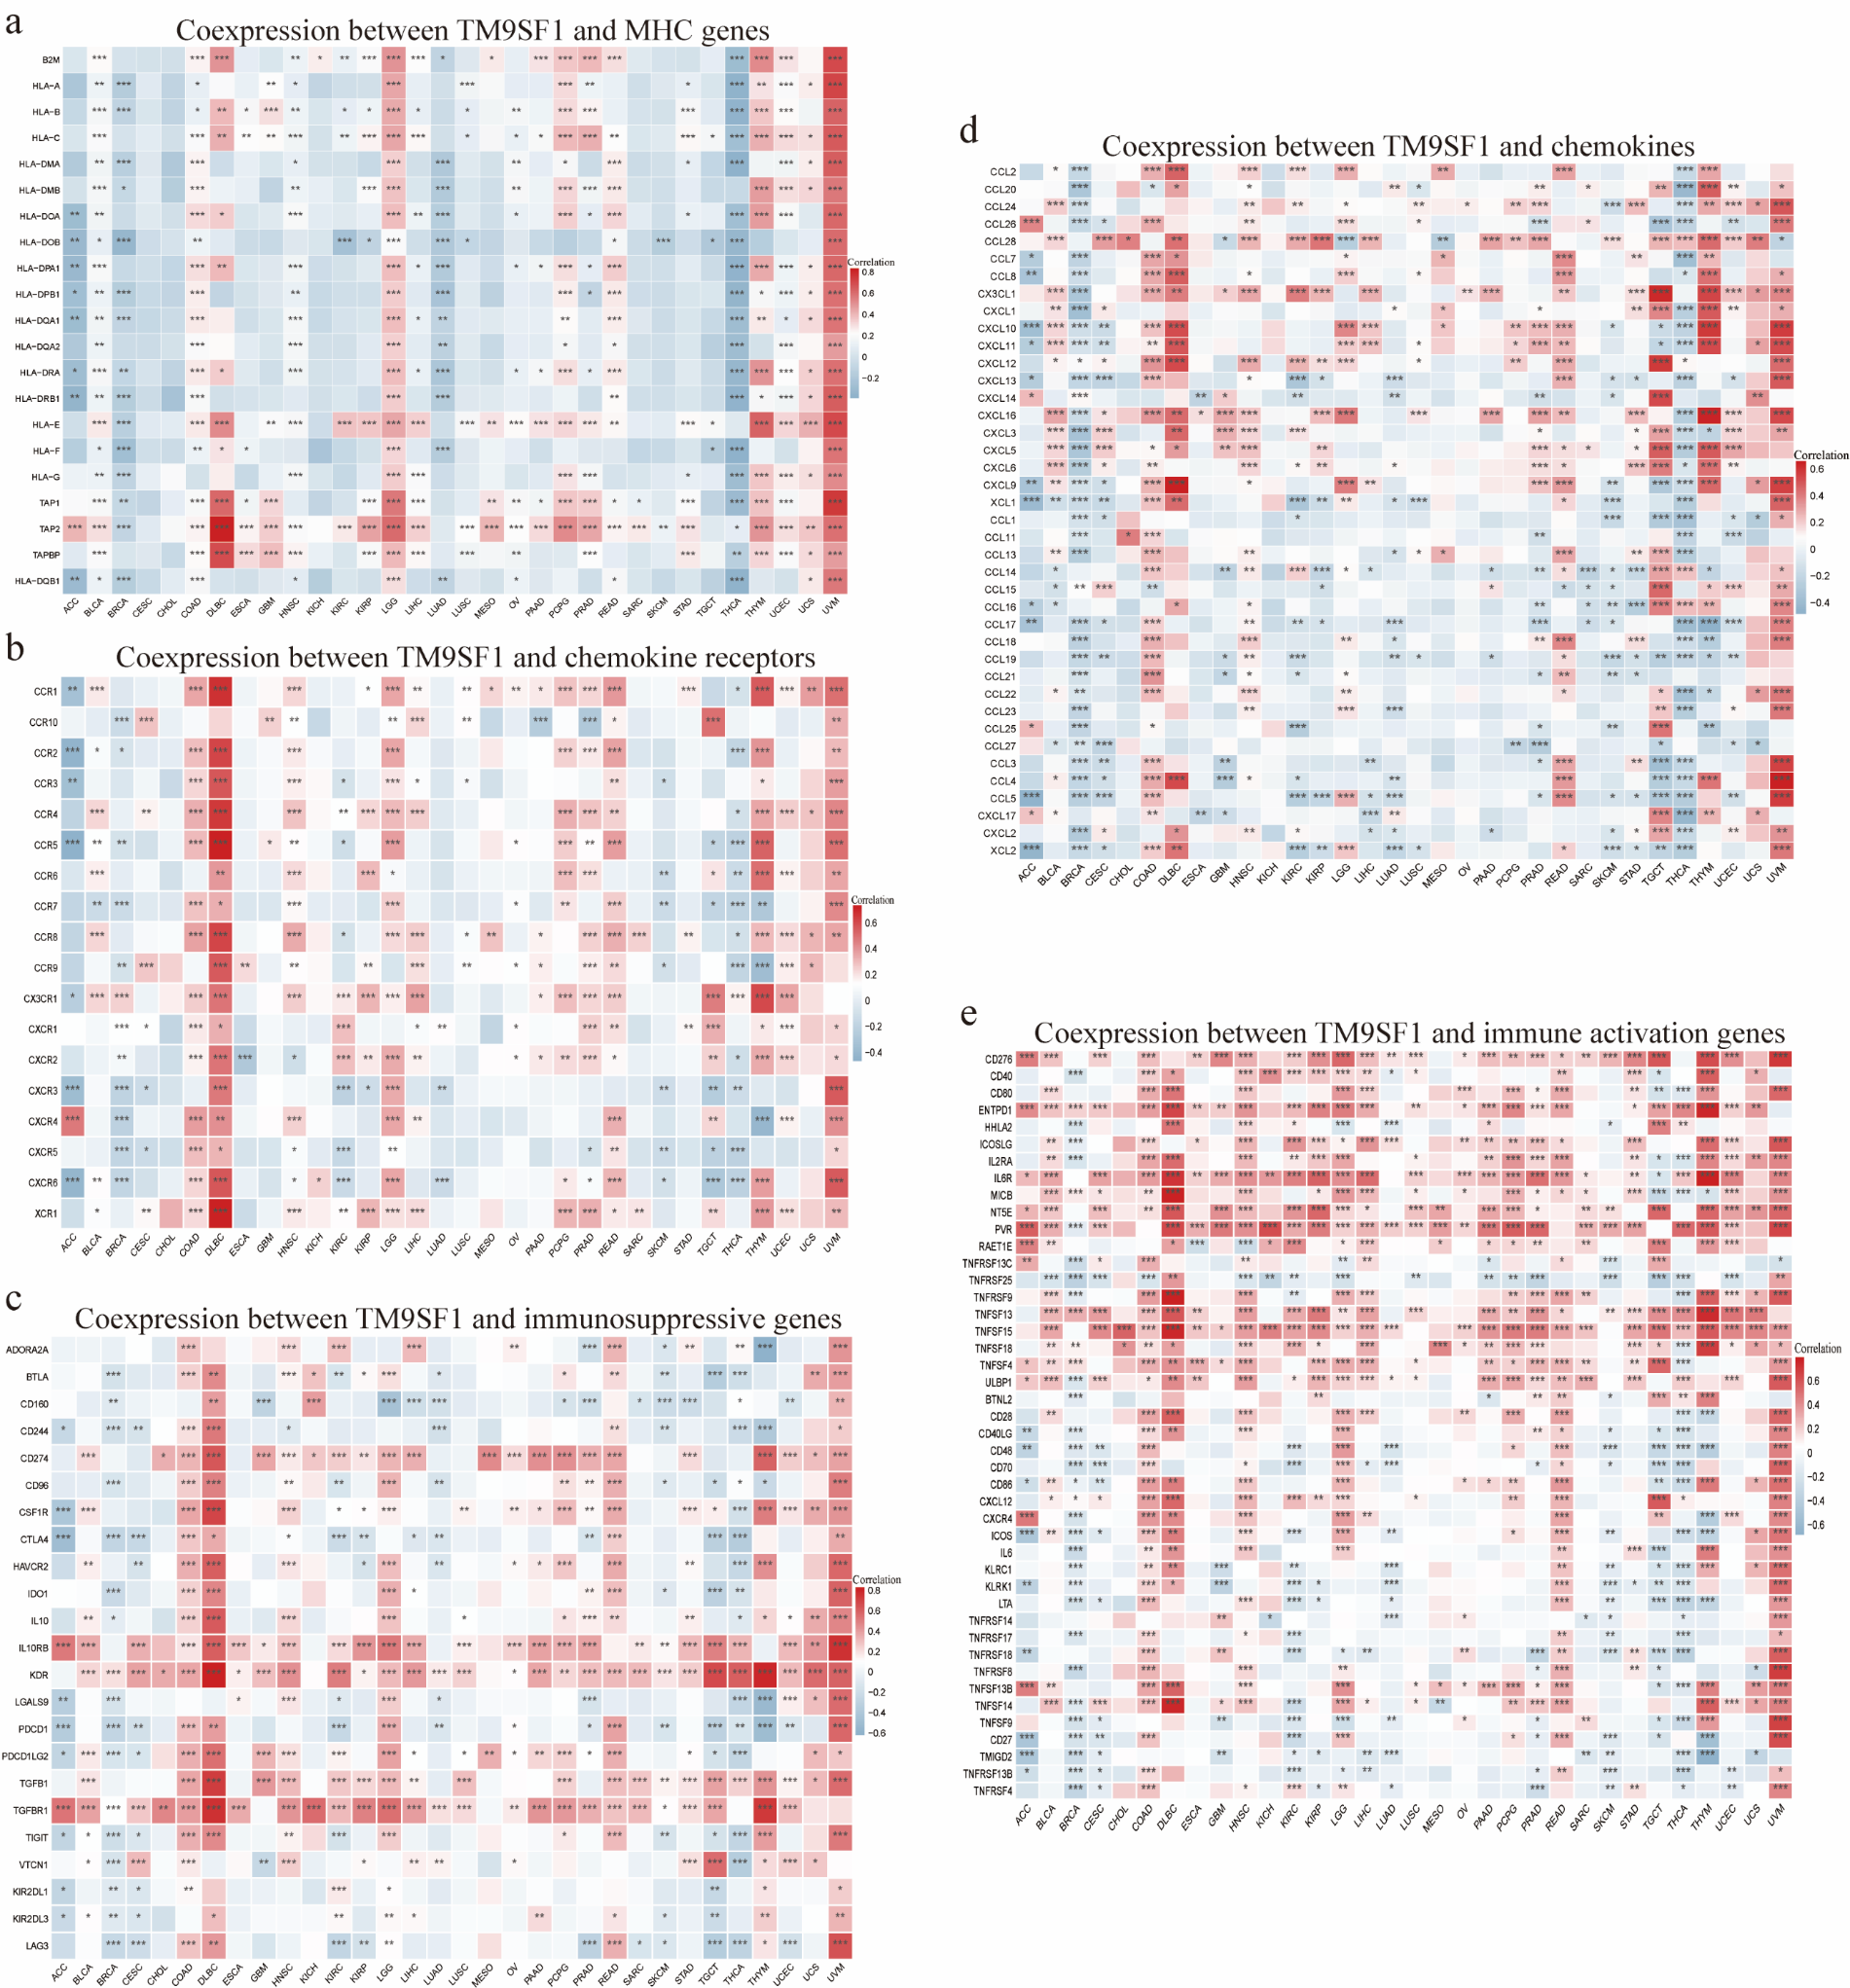


**Fig.s6.** Immunocorrelation analysis of TM9SF1. (**a–e**) Correlations between TM9SF1 expression and immune activation, immune suppressive, MHC, chemokine, chemokine receptor genes. (For interpretation of the references to color in this figure legend, the reader is referred to the web version of this article.)


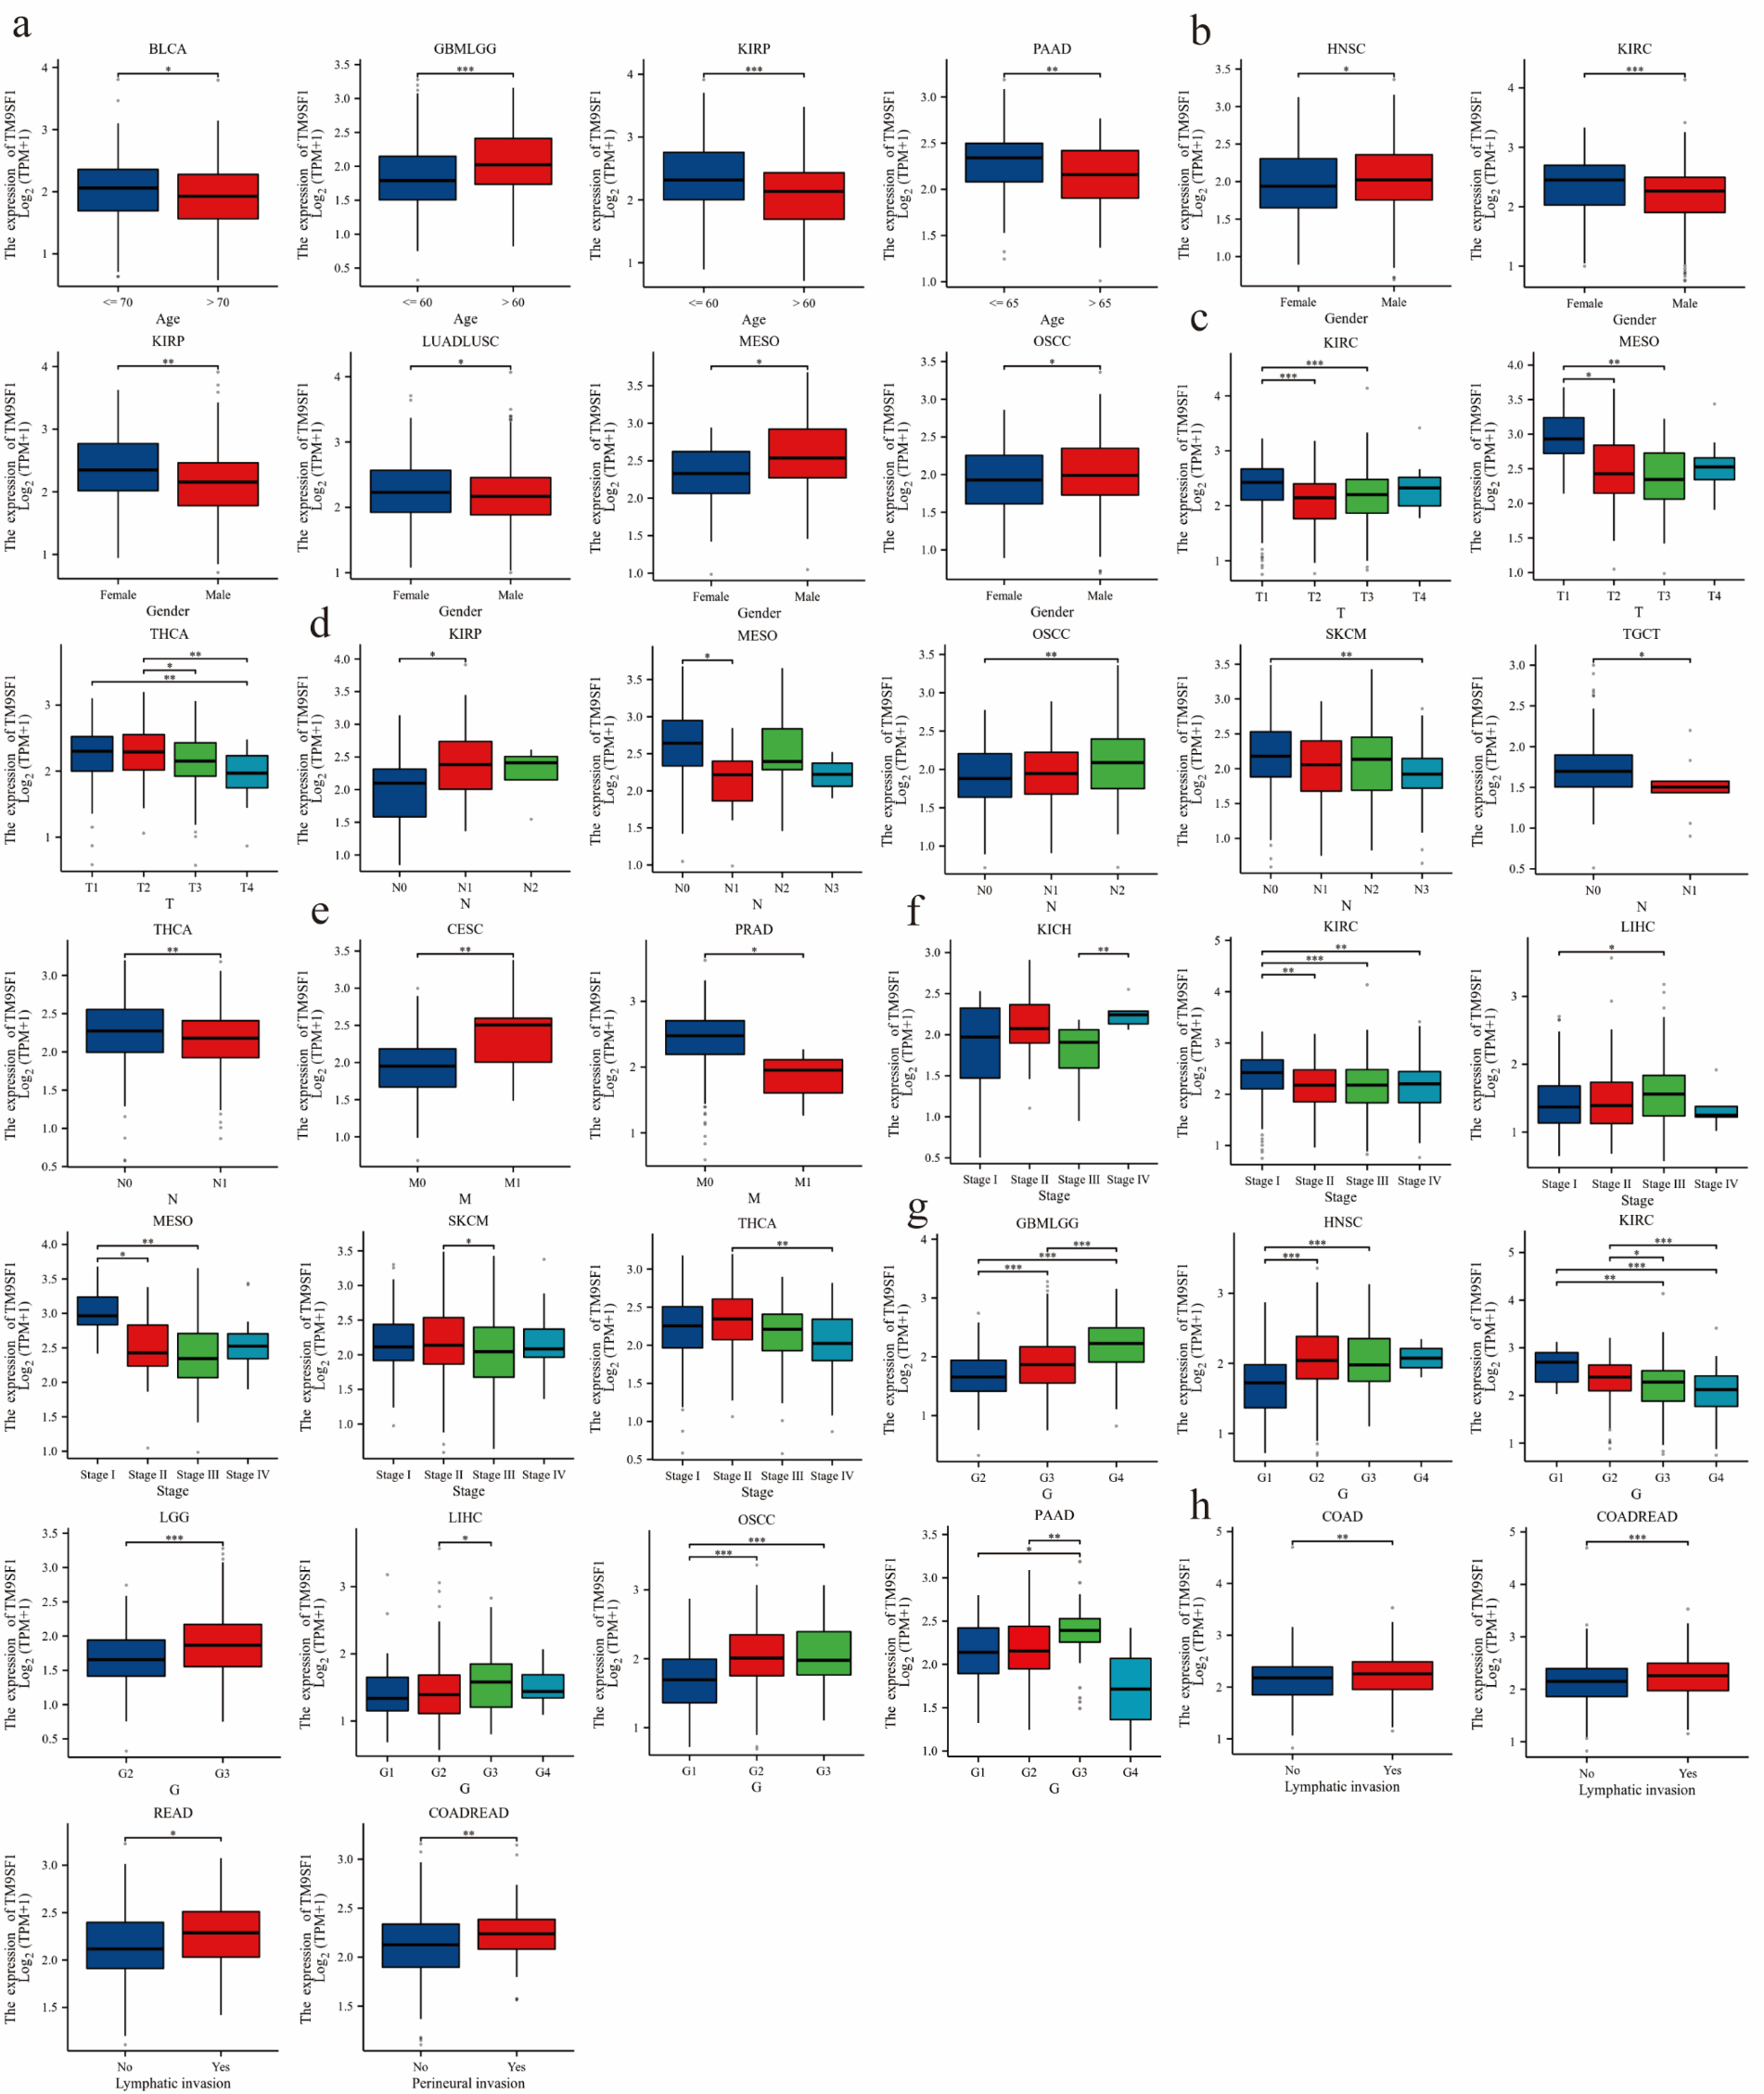


**Fig.s7.** The correlation between TM9SF1 and clinical parameters. **a**. Differences of TM9SF1 expression among different age groups. **b**. Differences of TM9SF1 expression between females and males. **c**. Differences of TM9SF1 expression among various T stages. **d**. Differences of TM9SF1 expression among lymph node statuses. **e**. Differences of TM9SF1 expression among various M stages. **f**. Differences of TM9SF1 expression among various tumor stages. **g.** Differences of TM9SF1 expression among various tumor grades. **h**. Differences of TM9SF1 expression among various Lymphatic and Perineural invasion. *P<0.05; **P<0.01; ***P<0.001. (For interpretation of the references to color in this figure legend, the reader is referred to the web version of this article.)


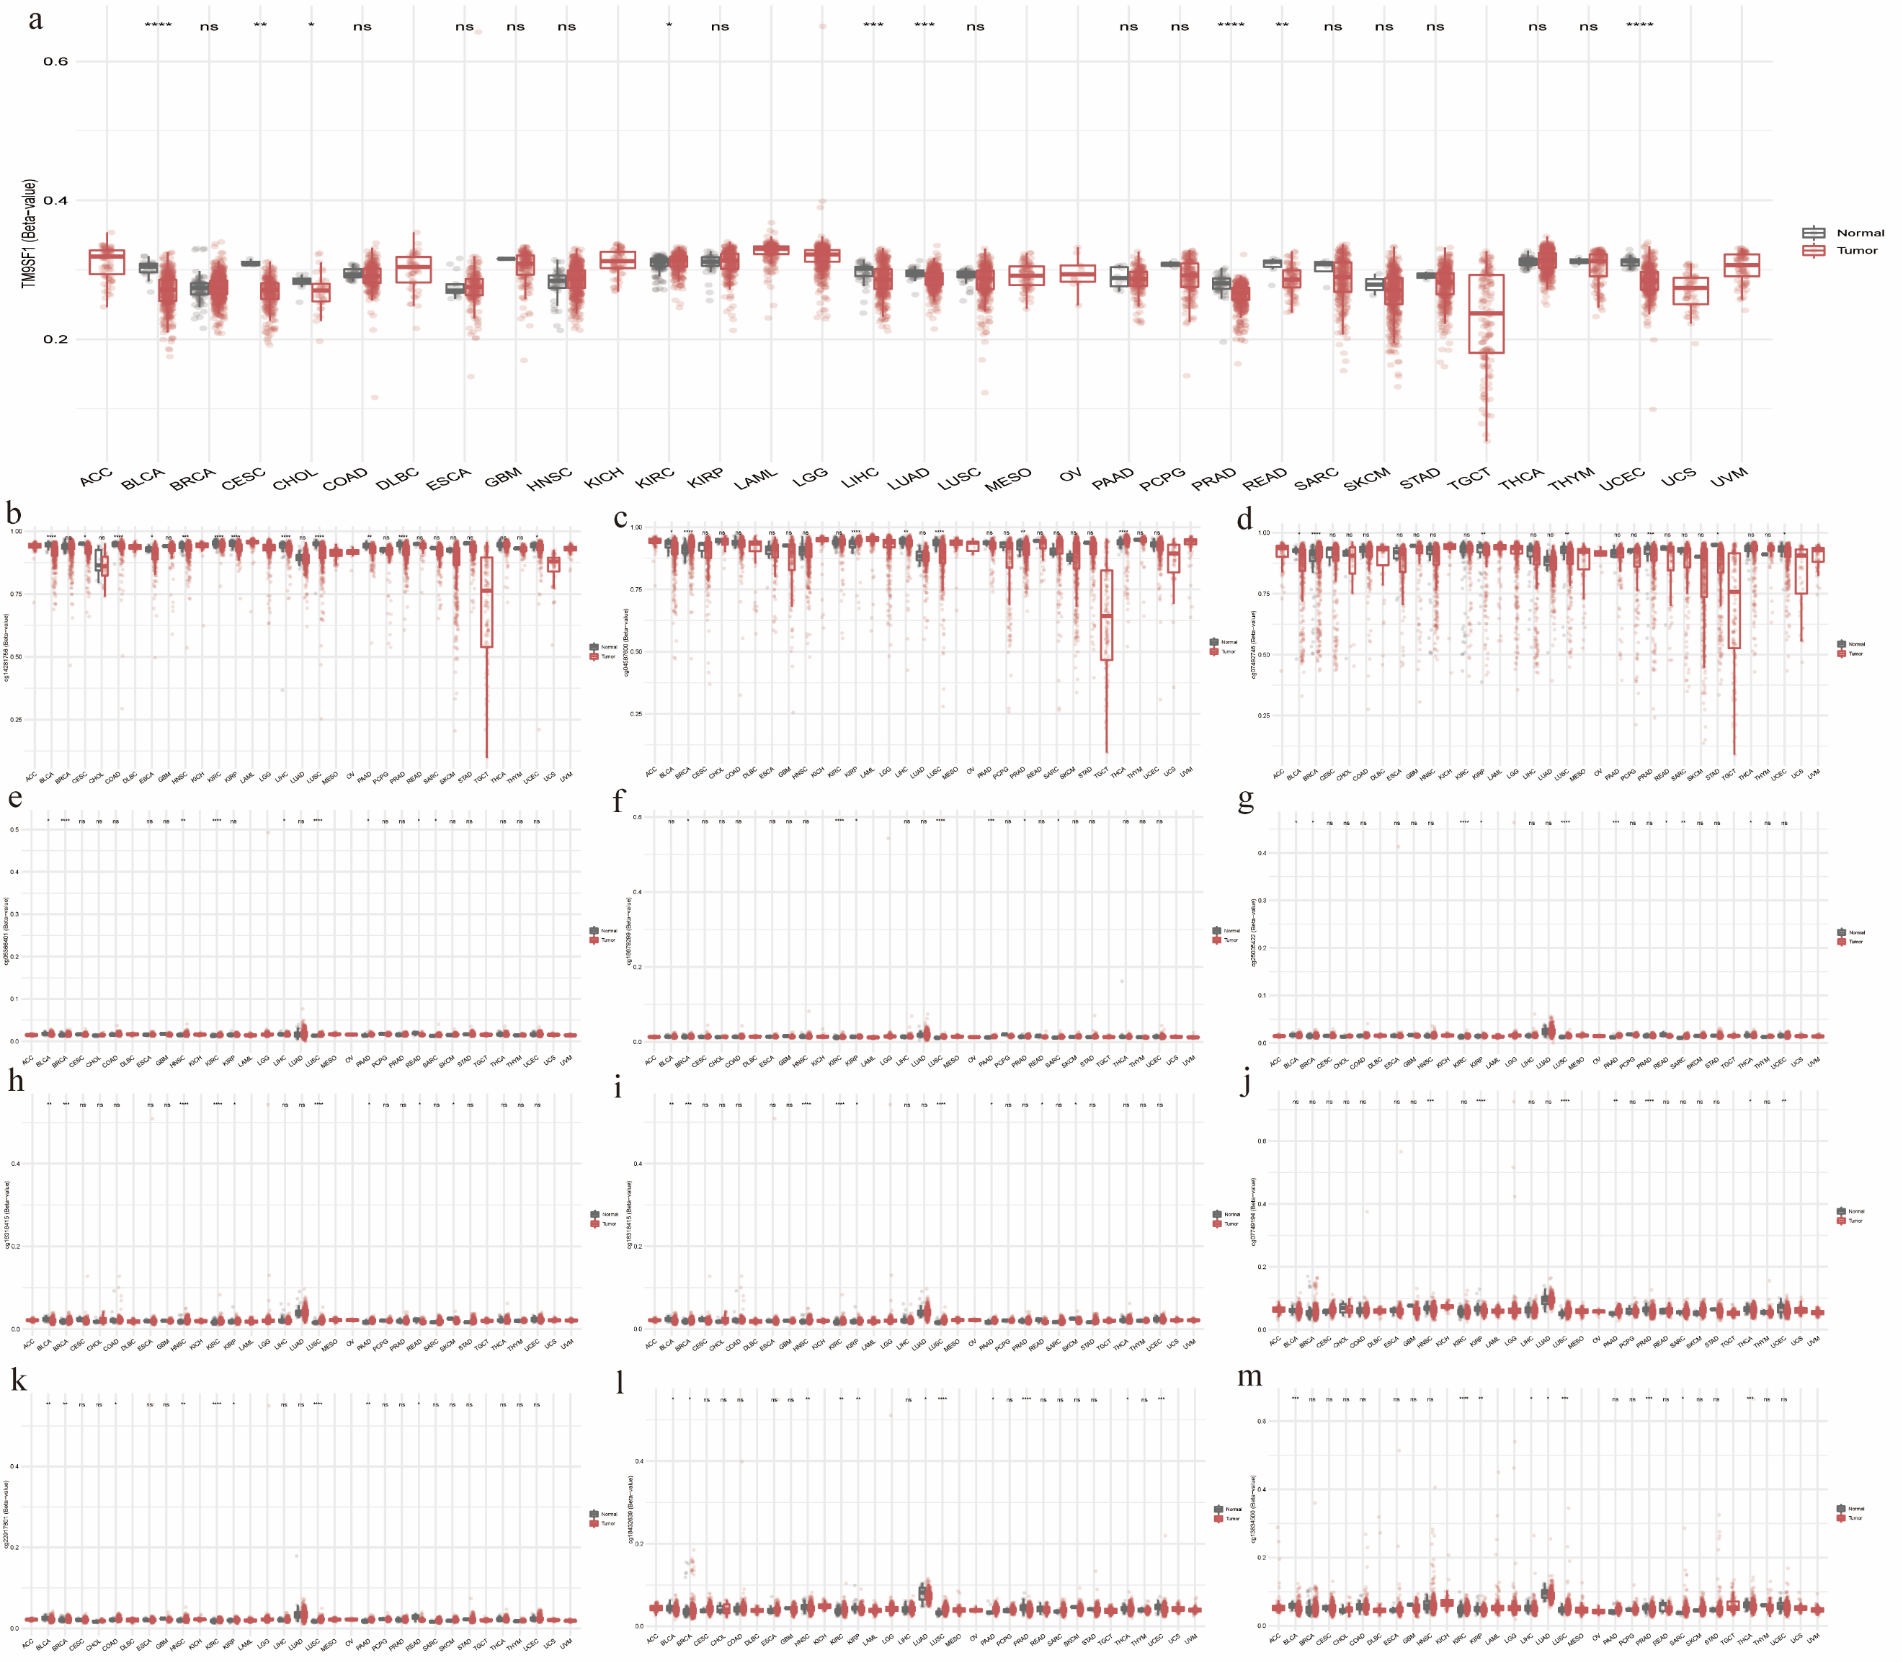


**Fig.s8.** TM9SF1 methylation analysis in various tumors. **a**. Methylation levels between normal and tumor tissues (red organ, tumor; grey organ, normal). **b**. Differences of 12 methylation sites of TM9SF1 between normal and tumor tissues (red organ, tumor; grey organ, normal). *P<0.05; **P<0.01; ***P<0.001; ****P<0.0001; ns or -, not significant. (For interpretation of the references to color in this figure legend, the reader is referred to the web version of this article.)


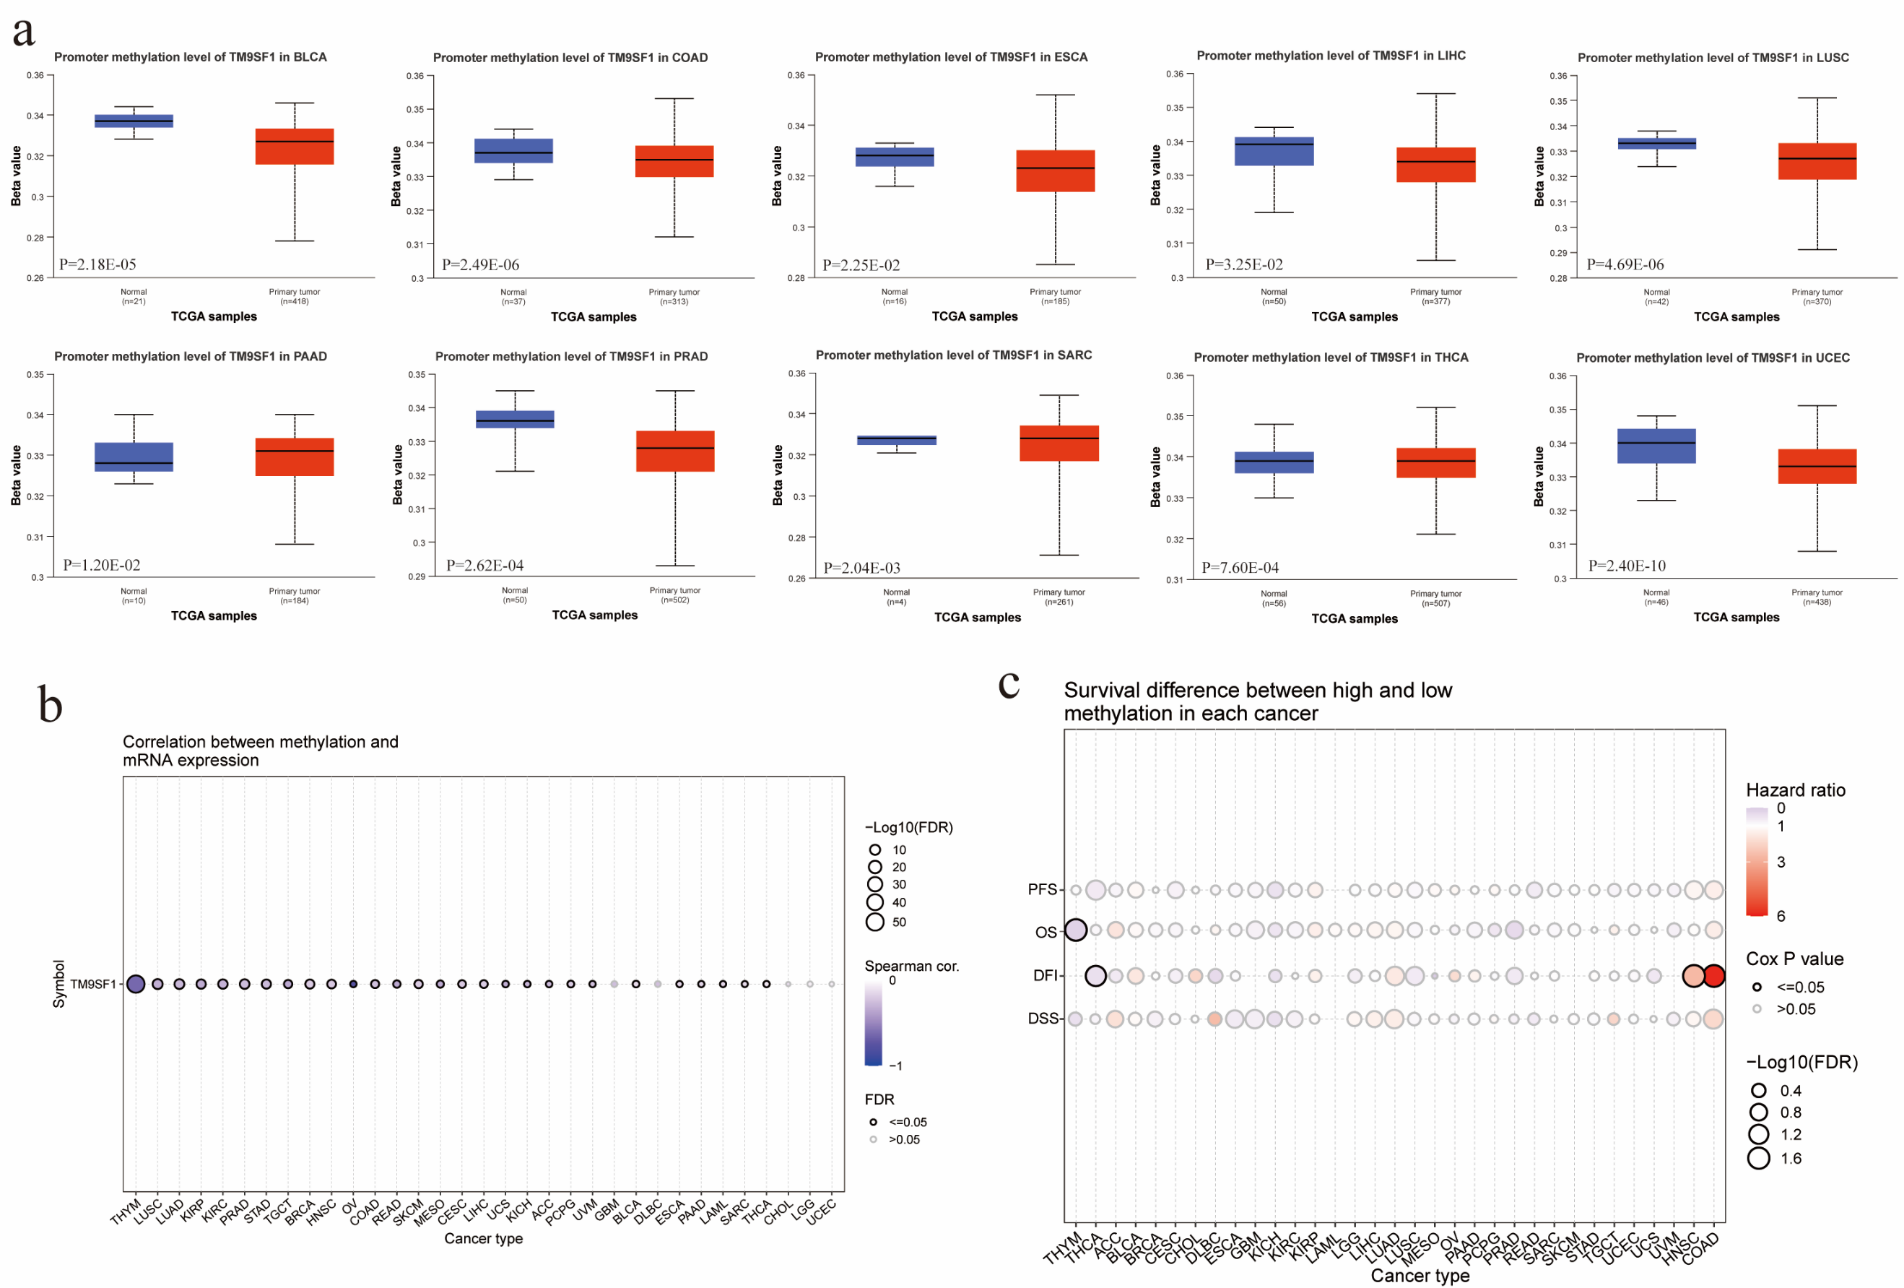


**Fig.s9.** **a**. The promoter methylation level of TM9SF1 in various cancers (red organ, tumor; blue organ, normal). **b.** DNA methylation features of TM9SF1 in pan-cancer from the UALCAN database. **c.** The correlation between DNA methylation features and the prognosis of pan-cancer patients. (For interpretation of the references to color in this figure legend, the reader is referred to the web version of this article.)


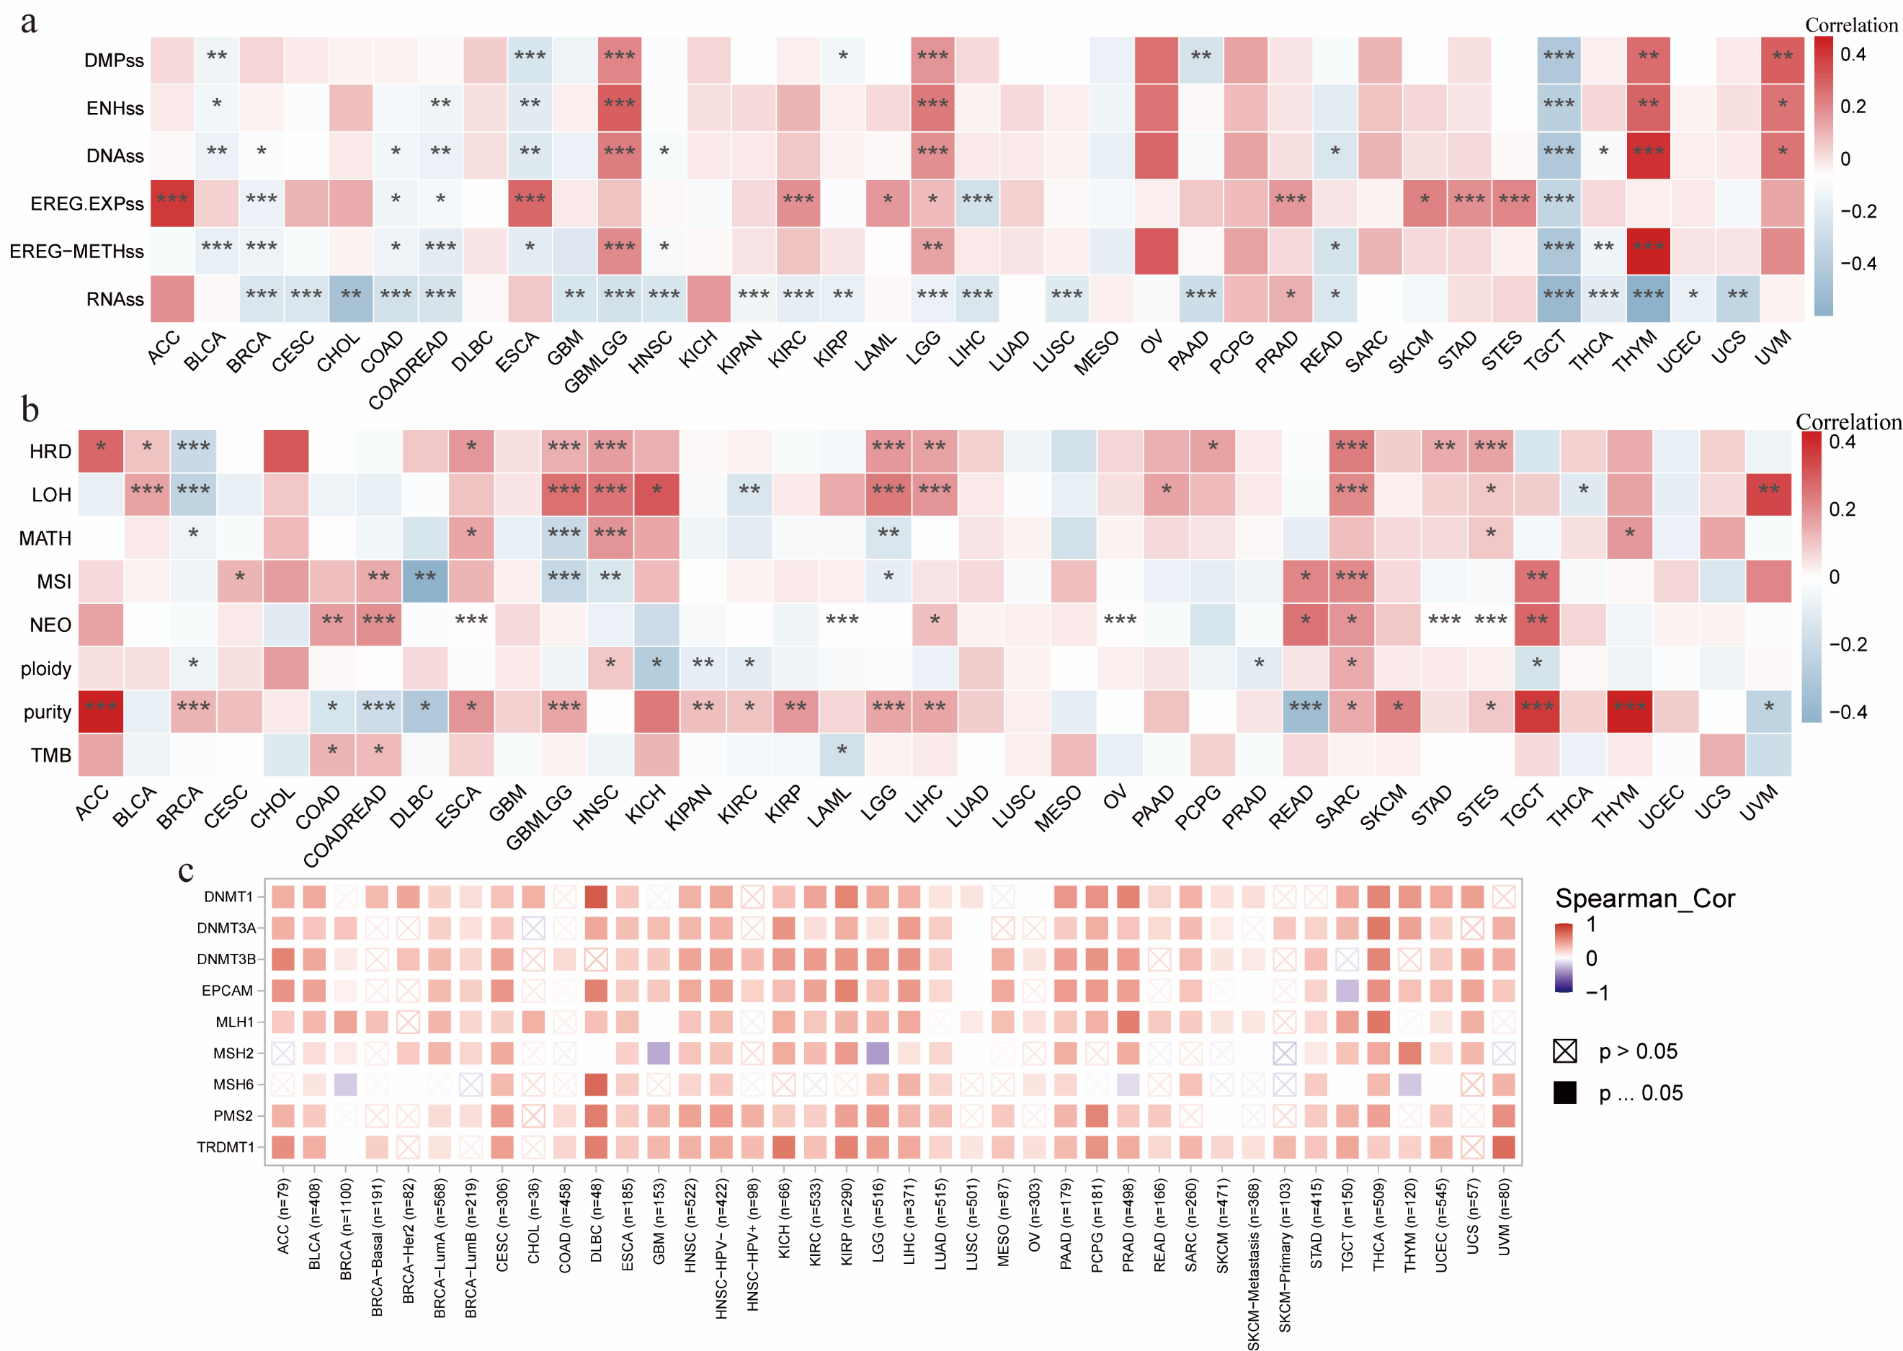


**Figs.10.** The correlation between TM9SF1 and tumor progression related factors. **a**. The correlation between TM9SF1 and tumor stemness (red, positive correlation; blue, negative correlation). **b**. The correlation between TM9SF1 and tumor heterogeneity, including TMB, MSI, NEO, MATH, LOH, HRD, purity, and ploidy (red, positive correlation; blue, negative correlation). **c.** The correlation between TM9SF1 and MMR genes and DNA methyltransferases (red, positive correlation; blue, negative correlation). *P < 0.05; **P < 0.01; ***P < 0.001. (For interpretation of the references to color in this figure legend, the reader is referred to the web version of this article.)


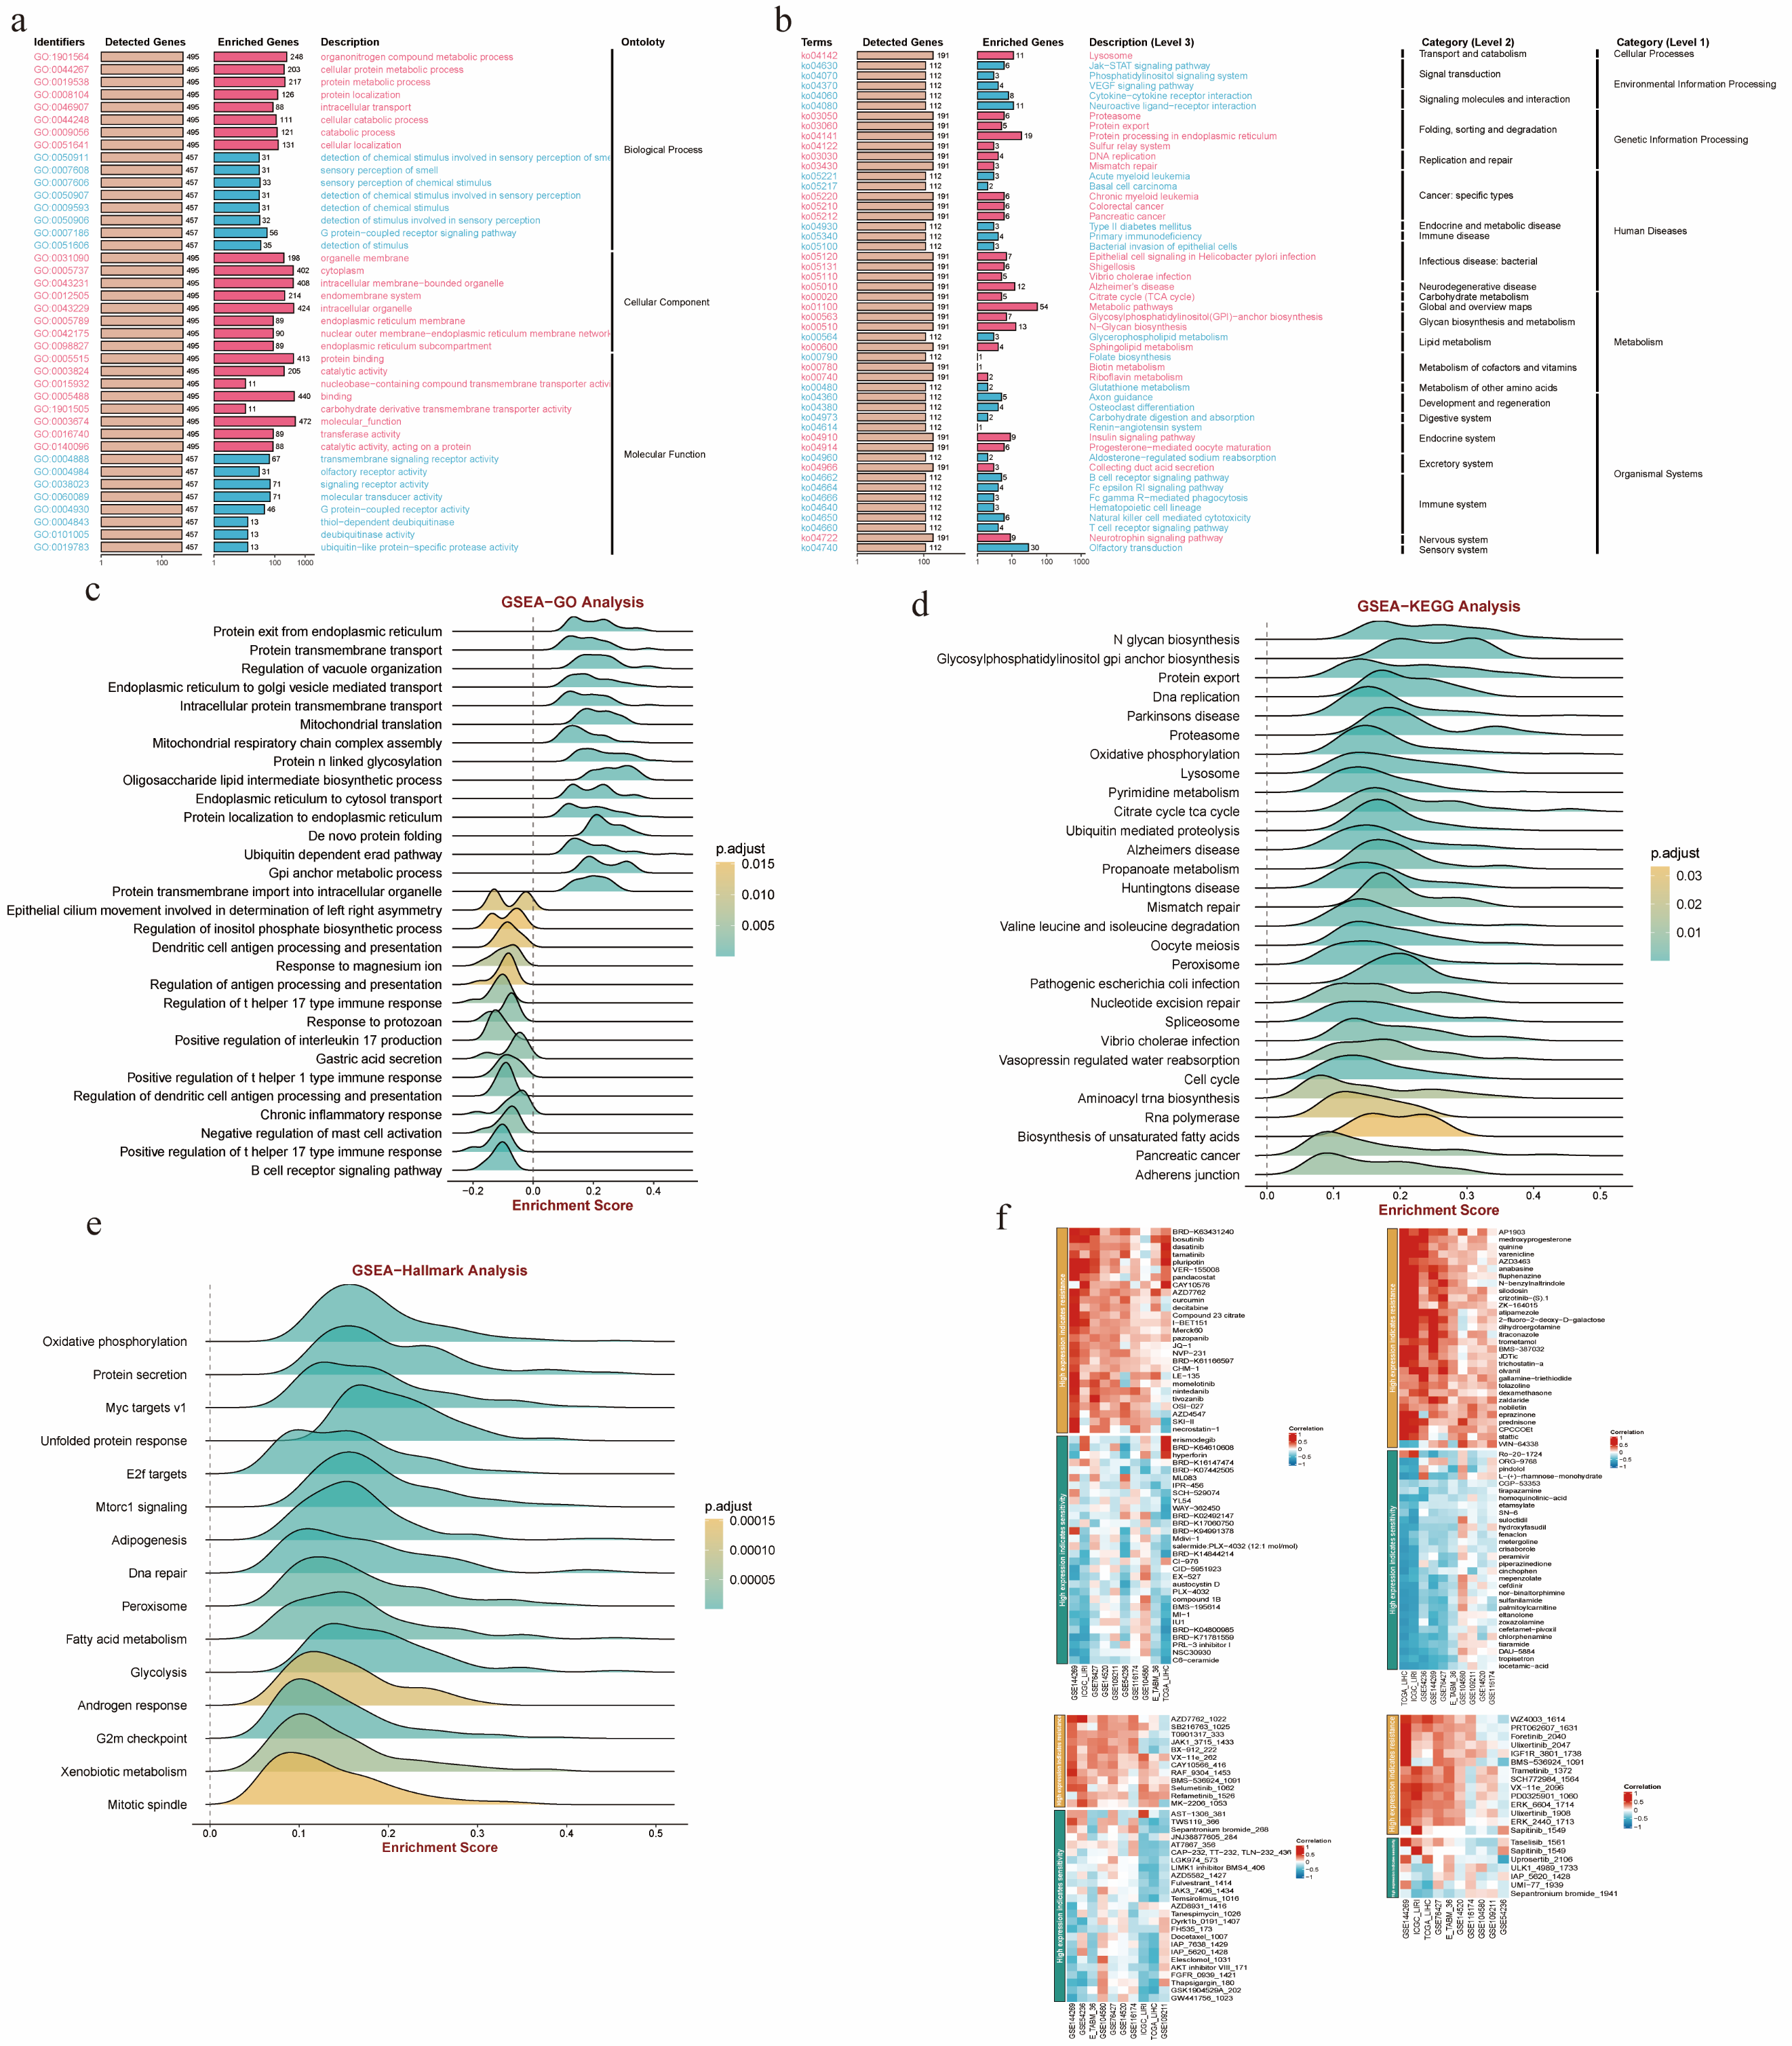


**Figs.11.** Functional enrichment and drug sensitivity analyses for TM9SF1 in HCC. **a**. Top entries of the enrichment results of GO terms related to TM9SF1. **b**. Top entries of the enrichment results of KEGG pathways related to TM9SF1. Representative GSEA-GO enrichments (**c**), GSEA‐KEGG enrichments (**d**), and GSEA‐Hallmarks (**e**) related to TM9SF1. **f.** The correlation analysis between TM9SF1 and various drugs based on three drug-gene databases (GDSC, CTRP, and PRISM) using 10 independent HCC cohorts.


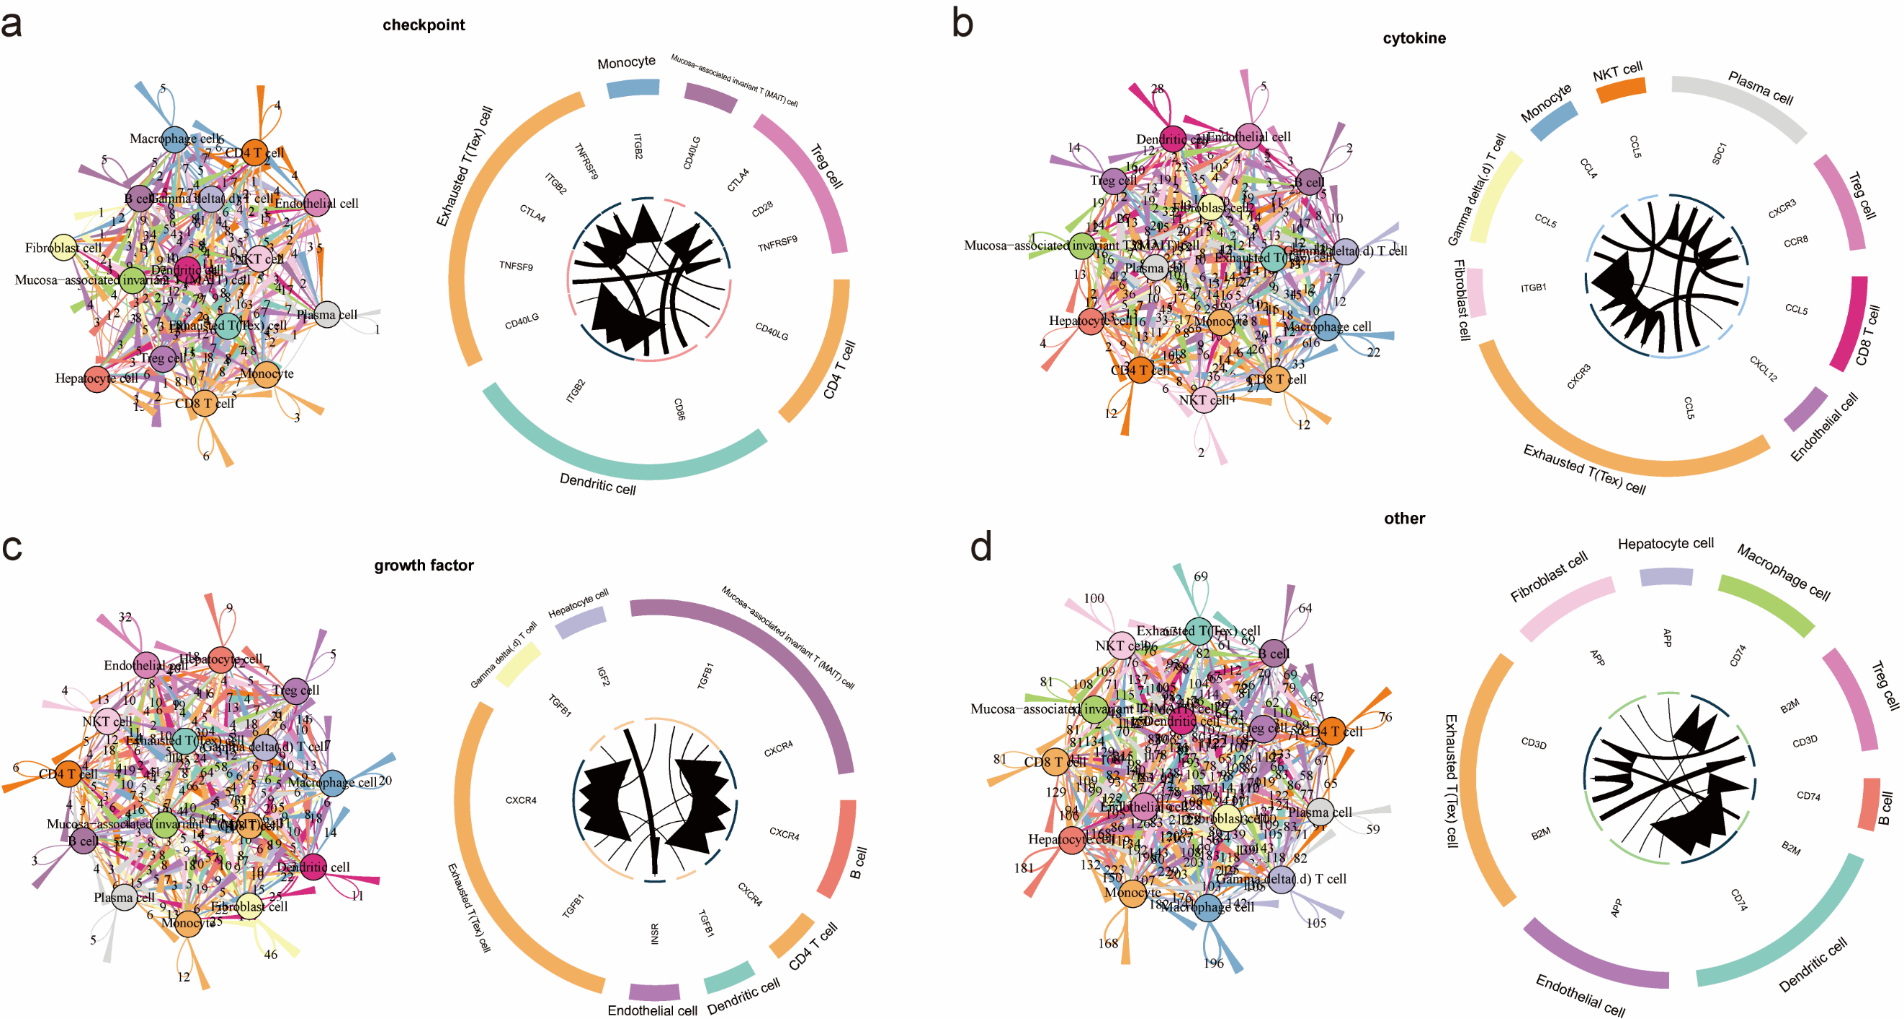


**Figs.12.** Cellular communication within two cell clusters with different TM9SF1 expressions. **a-d**. The ligand-receptor (LR) pairs and cellular interaction network for identified cell clusters in (**a**) immune checkpoints, (**b**) cytokines, (**c**) grow factors

, and (**d**) others.


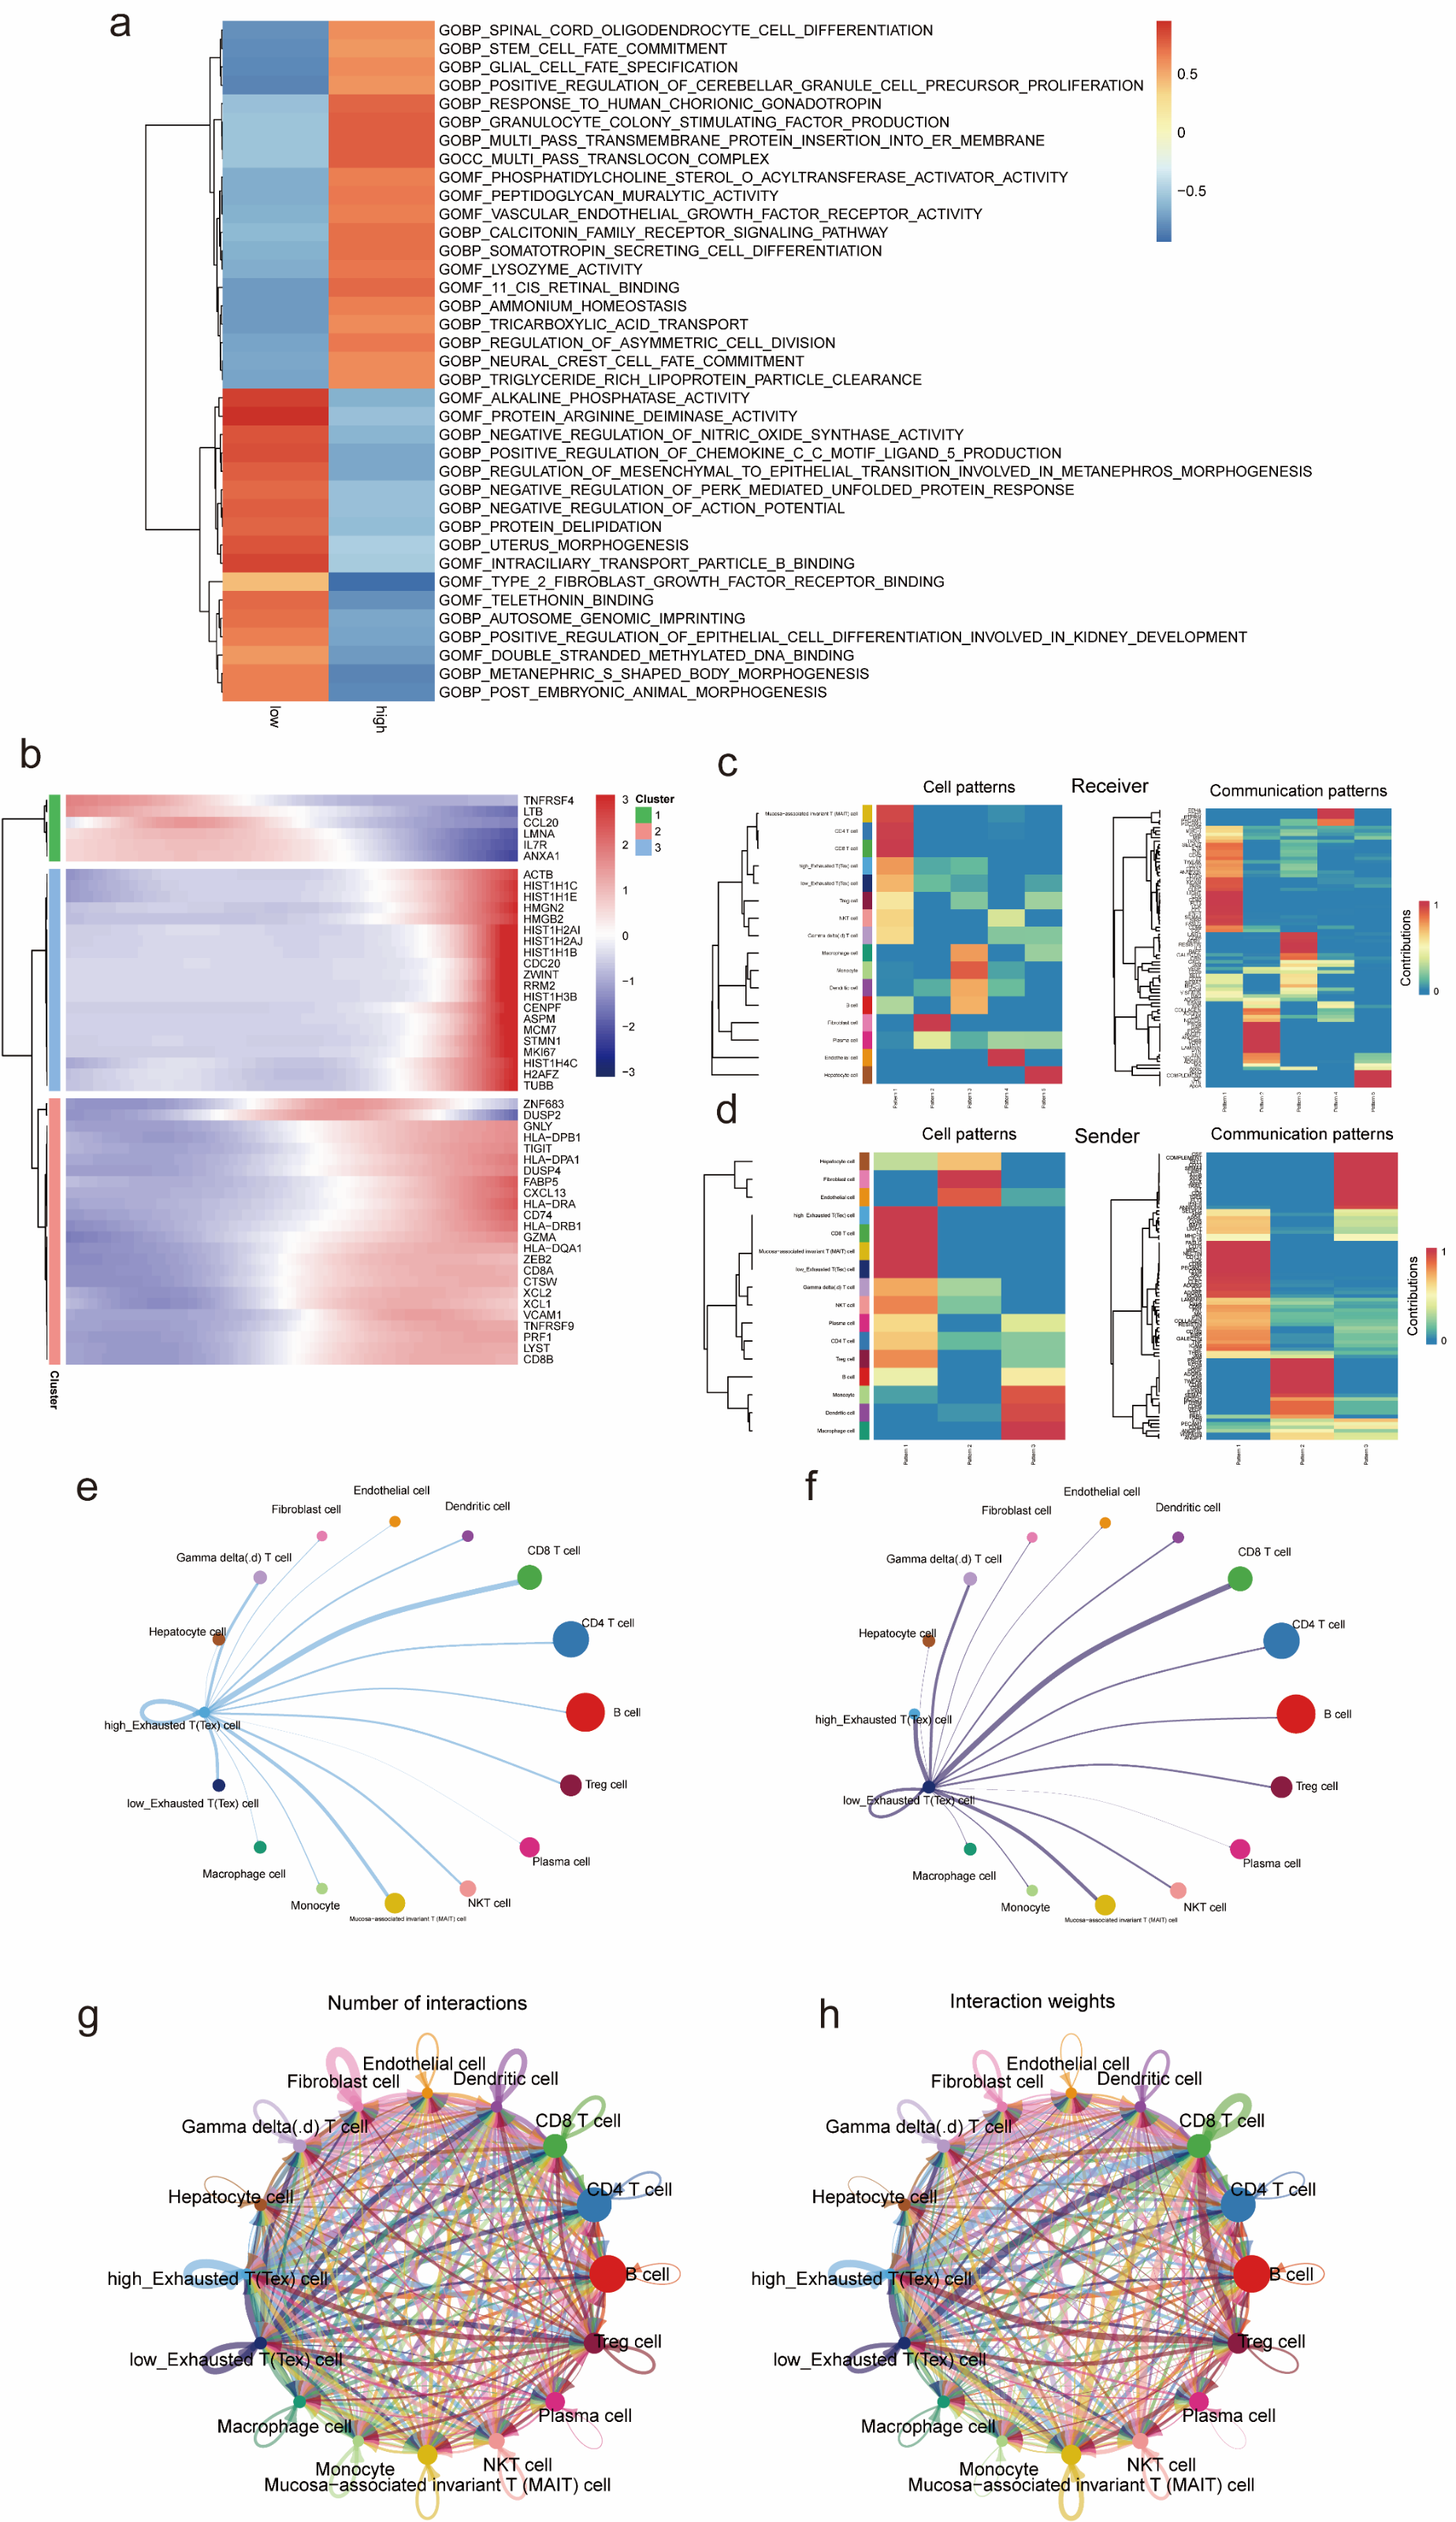


**Figs.13.** **a.** GSVA enrichment between high-TM9SF1 and low-TM9SF1 based on single-cell RNA-seq data. **b.** Pseudotime trajectory analysis based on TM9SF1 expression. **c.** The heatmap of the distribution of Tex cells and other cell groups across the five receiver patterns. **d.** The heatmap of the distribution of Tex cells and other cell groups across the three receiver patterns. **e.** Cellular interaction between High-TM9SF1 Tex cells and other cell groups. **f.** Cellular interaction between Low-TM9SF1 Tex cells and other cell groups. **g.** Number of interactions between Tex cells and other cell groups. **h.** Interaction weights of interactions between Tex cells and other cell groups.


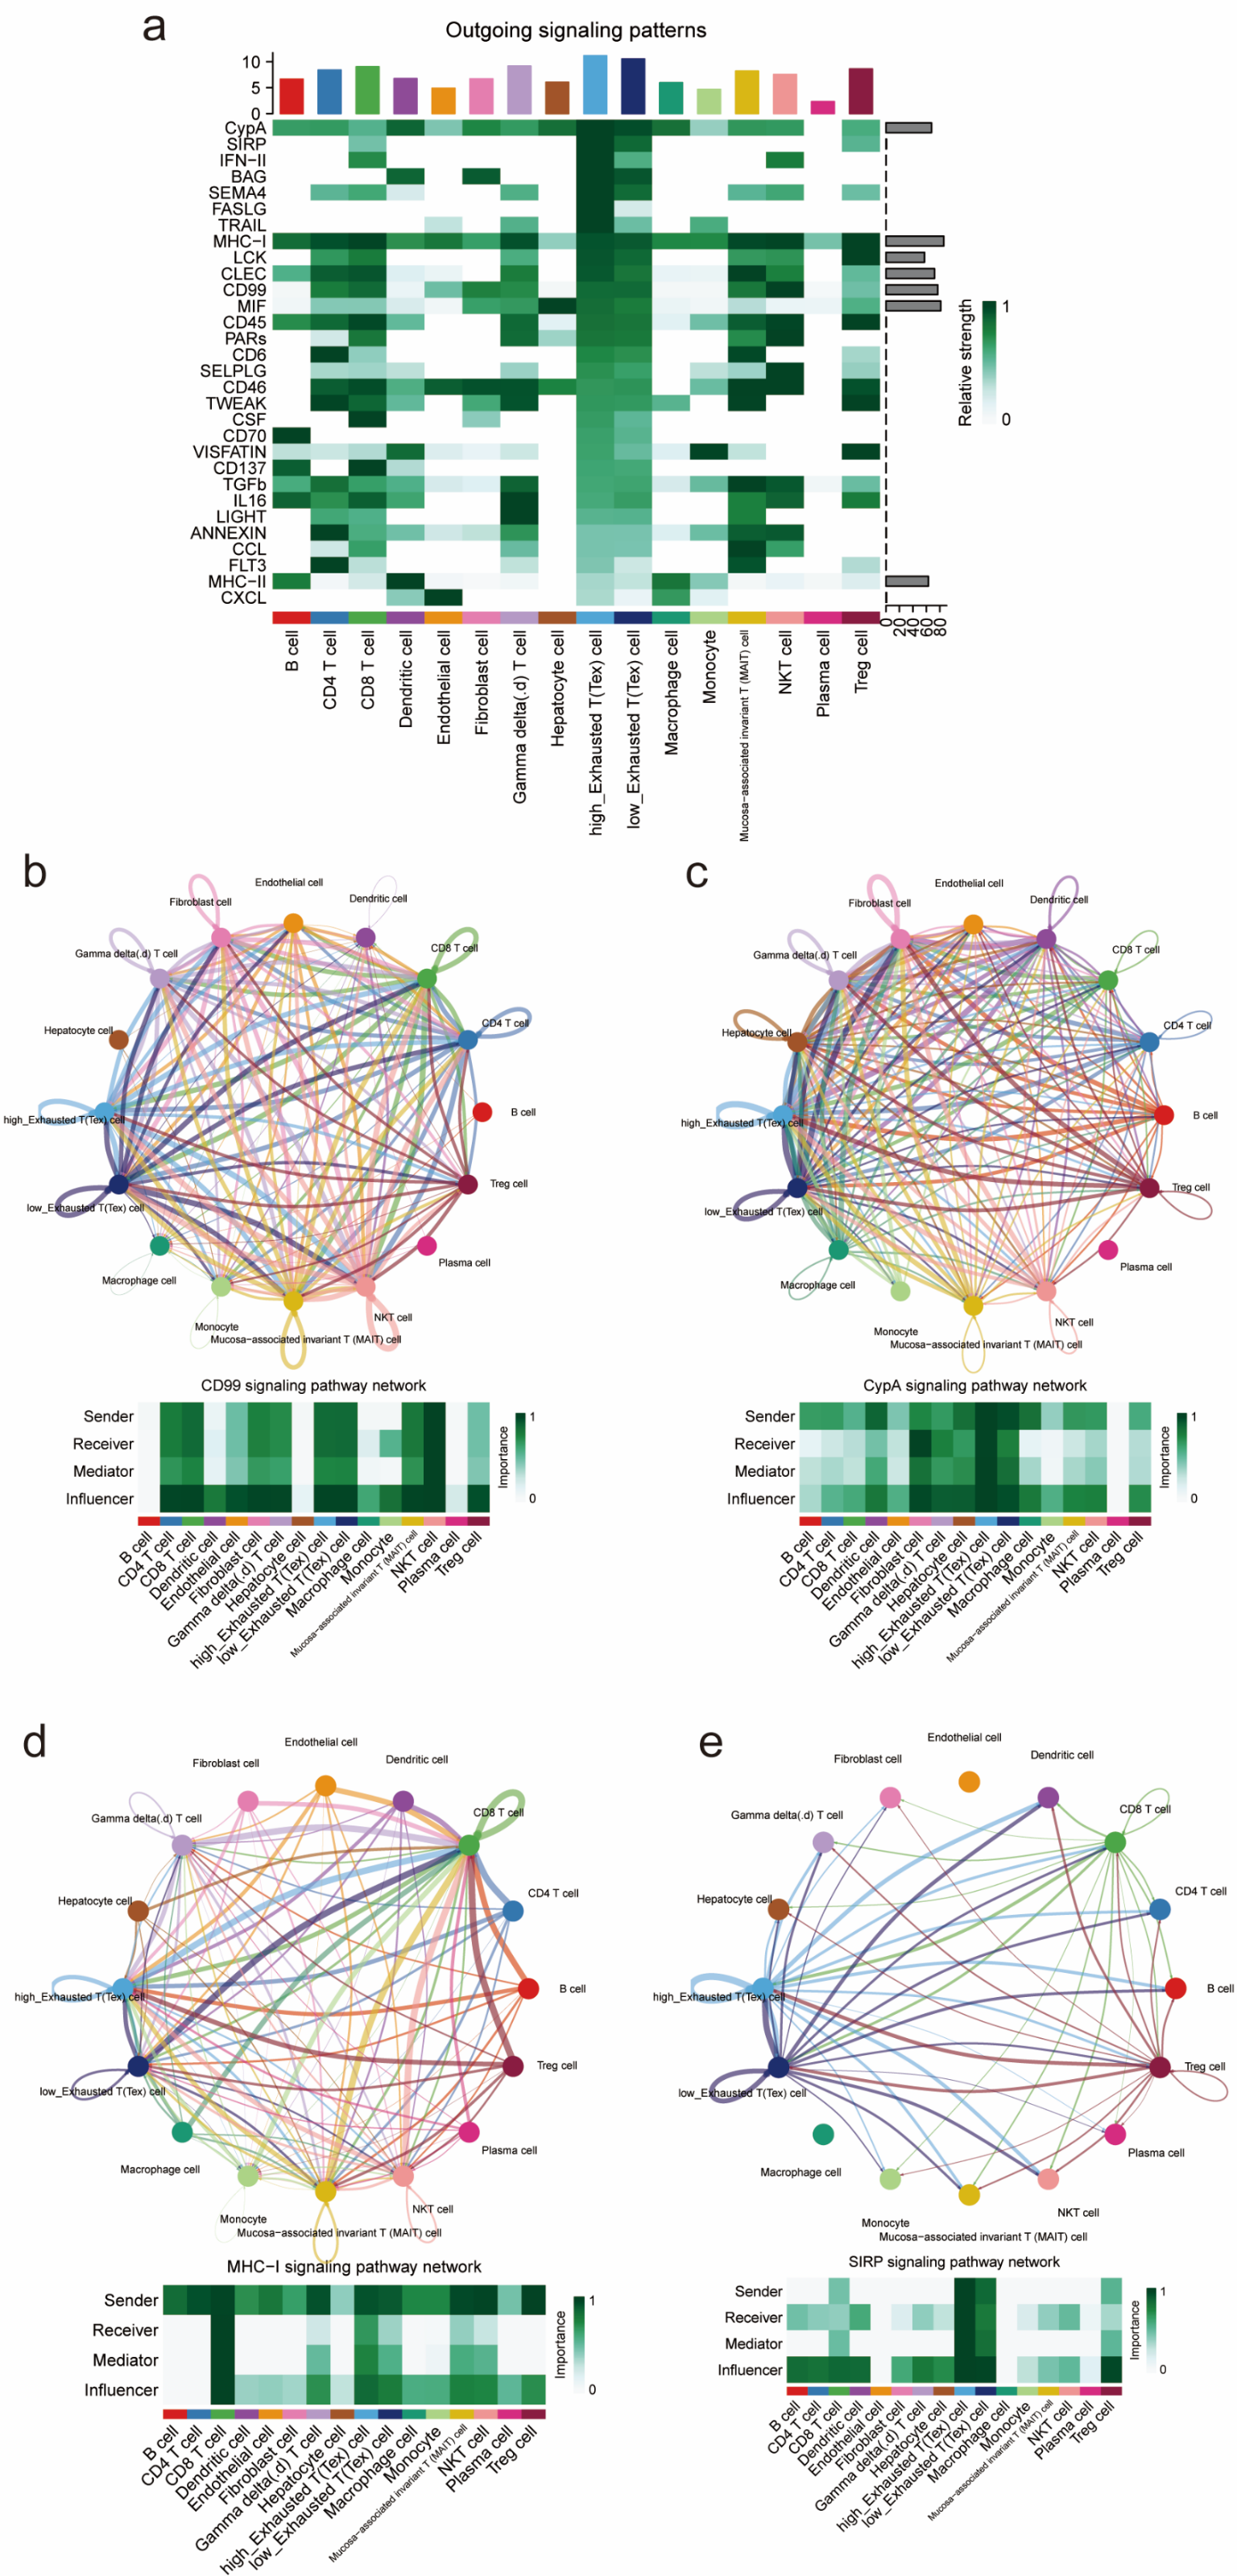


**Figs.14.** Cellular interaction within the two Tex cells clusters with high TM9SF1 expressions. **a.** The top 30 outgoing signaling molecules in Tex cells with high TM9SF1 expression. The cellular interaction network for identified cell clusters in different signaling pathways including **b.** CD99, **c.** CypA, **d.** MHC-Ⅰ and **e.** SIRP signaling pathway.


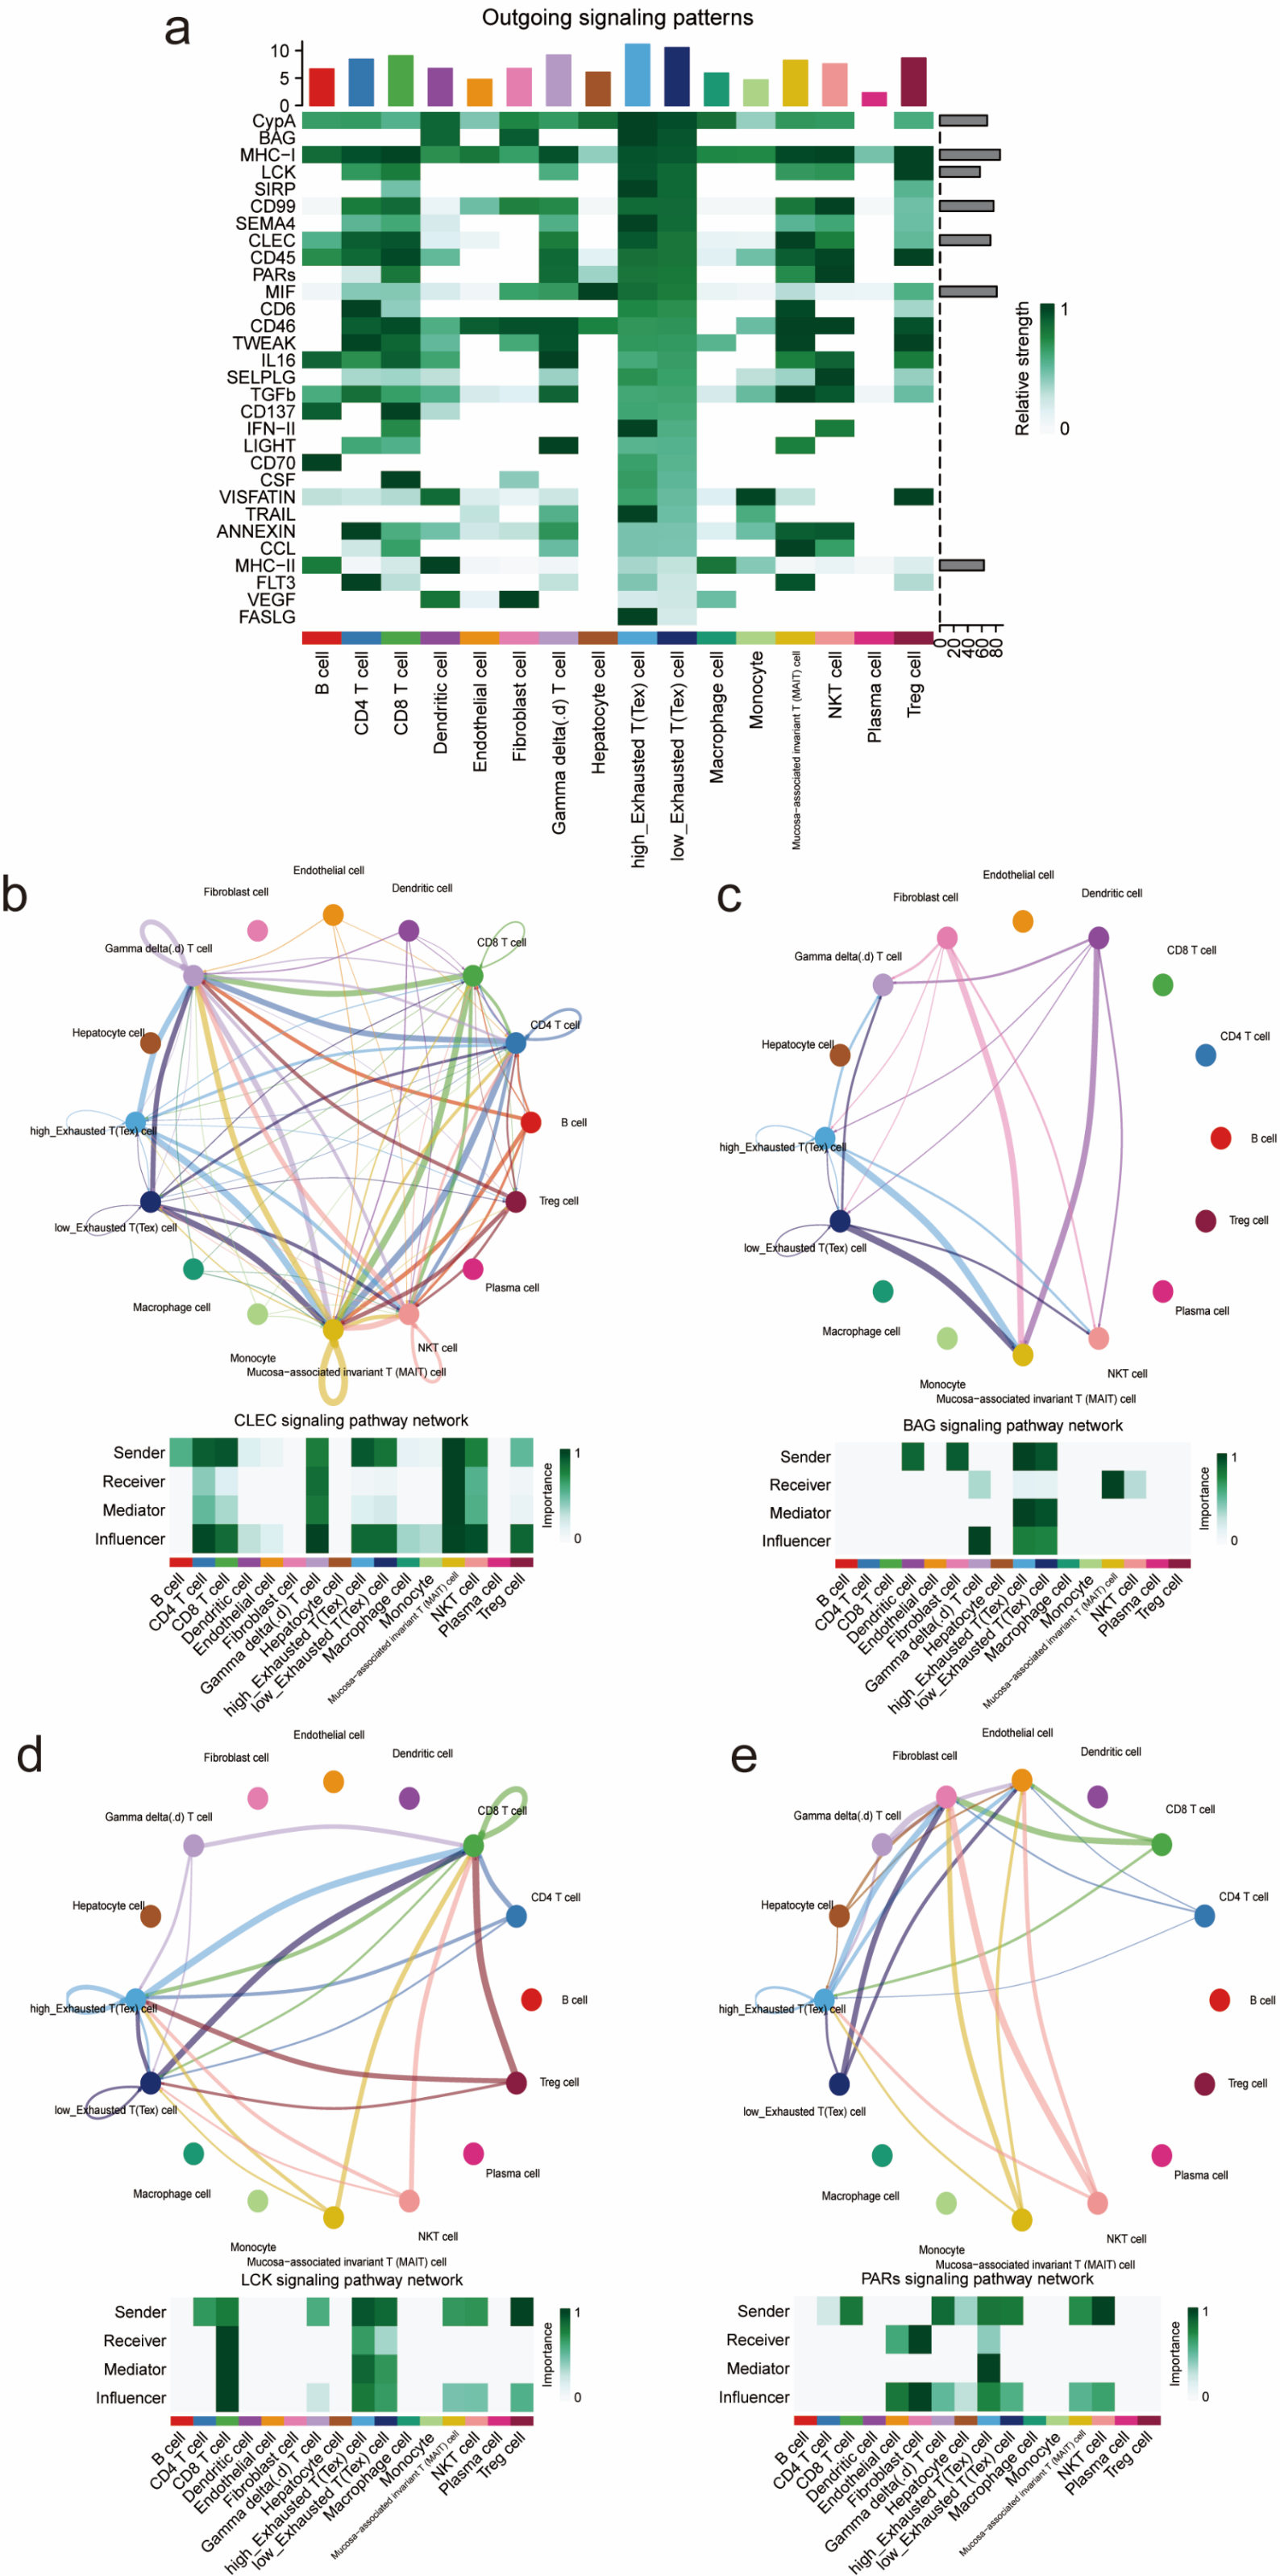


**Figs.15.** Cellular interaction within the two Tex cells clusters with low TM9SF1 expressions. **a.** The top 30 outgoing signaling molecules in Tex cells with low TM9SF1 expression. The cellular interaction network for identified cell clusters in different signaling pathways including **b.** CLEC, **c.** BAG, **d.** LCK and **e.** PARs signaling pathway.
